# Copper metabolism-related risk score identifies hepatocellular carcinoma subtypes and SLC27A5 as a potential regulator of cuproptosis

Xiaoyan Li<sup>1,2,\*</sup>, Jinping Wang<sup>3,\*</sup>, Zongliang Guo<sup>4,\*</sup>, Yong Ma<sup>5</sup>, Dawei Xu<sup>1</sup>, Daguang Fan<sup>6</sup>, Peng Dai<sup>6</sup>, Yifan Chen<sup>7</sup>, Qiongwen Liu<sup>8</sup>, Jinke Jiao<sup>8</sup>, Jinhan Fan<sup>8</sup>, Ningxue Wu<sup>8</sup>, Xin Li<sup>9</sup>, Guoyin Li<sup>8,10,11</sup>

<sup>1</sup>Department of Blood Transfusion, Shanxi Provincial People's Hospital, Affiliate of Shanxi Medical University, Taiyuan, Shanxi, China

<sup>2</sup>Department of Central Laboratory, Shanxi Provincial People's Hospital, Affiliate of Shanxi Medical University, Taiyuan, Shanxi, China

<sup>3</sup>Department of Ultrasound, Shanxi Provincial People's Hospital, Affiliate of Shanxi Medical University, Taiyuan, Shanxi, China

<sup>4</sup>Department of General Surgery, Shanxi Province Cancer Hospital, Affiliated of Shanxi Medical University, Taiyuan, Shanxi, China

<sup>5</sup>Department of Thoracic Surgery, Shanxi Province Cancer Hospital, Affiliated of Shanxi Medical University, Taiyuan, Shanxi, China

<sup>6</sup>Department of Hepatobiliary and Pancreatic Surgery, Shanxi Provincial People's Hospital, Affiliate of Shanxi Medical University, Taiyuan, Shanxi, China

<sup>7</sup>College of Management, Zhejiang Shuren University, Hangzhou, Zhejiang, China

<sup>8</sup>College of Life Science and Agronomy, Zhoukou Normal University, Zhoukou, Henan, China

<sup>9</sup>Department of Geriatric Medicine, Shanxi Provincial People's Hospital, Affiliate of Shanxi Medical University, Taiyuan, Shanxi, China

<sup>10</sup>MOE Key Laboratory of Modern Teaching Technology, Center for Teacher Professional Ability Development, Shaanxi Normal University, Xi'an, Shannxi, China

<sup>11</sup>Academy of Medical Science, Zhengzhou University, Zhengzhou, Henan, China

\*Equal contribution

**Correspondence to:** Xin Li, Guoyin Li; **email:** [wode\\_xinkong@163.com](mailto:wode_xinkong@163.com), <https://orcid.org/0009-0007-4723-0769>; [ligy@zknu.edu.cn](mailto:ligy@zknu.edu.cn)

**Keywords:** copper metabolism, cuproptosis, hepatocellular carcinoma, immunotherapy, SLC27A5

**Received:** May 24, 2023

**Accepted:** November 10, 2023

**Published:** December 28, 2023

**Copyright:** © 2023 Li et al. This is an open access article distributed under the terms of the [Creative Commons Attribution License](https://creativecommons.org/licenses/by/4.0/) (CC BY 4.0), which permits unrestricted use, distribution, and reproduction in any medium, provided the original author and source are credited.

## ABSTRACT

**Aims:** Dysregulated copper metabolism has been noticed in many types of cancer including hepatocellular carcinoma (HCC); however, a comprehensive understanding about this dysregulation still remains unclear in HCC.

**Methods:** A set of bioinformatic tools was integrated to analyze the expression and prognostic significance of copper metabolism-related genes. A related risk score, termed as CMscore, was developed via univariate Cox regression, least absolute shrinkage and selection operator (LASSO) Cox regression and multivariate Cox regression. Pathway enrichment analyses and tumor immune cell infiltration were further investigated in CMscore stratified HCC patients. Weighted correlation network analysis (WGCNA) was used to identify potential regulator of cuproptosis.

**Results:** Copper metabolism was dysregulated in HCC. HCC patients in the high-CMscore group showed a significantly lower overall survival (OS) and enriched in most cancer-related pathways. Besides, HCC patients with high CMscore had higher expression of pro-tumor immune infiltrates and immune checkpoints. Moreover, cancer patients with high CMscore from two large cohorts exhibited significantly prolonged survival time after immunotherapy. WGCNA and subsequently correlation analysis revealed that SLC27A5 might be a potential regulator of cuproptosis in HCC. *In vitro* experiments revealed that SLC27A5 inhibited cell proliferation and migration of HCC cells and could upregulate FDX1, the key regulator of cuproptosis.

**Significance:** The CMscore is helpful in clustering HCC patients with distinct prognosis, gene mutation signatures, and sensitivity to immunotherapy. SLC27A5 might serve as a potential target in the induction of cuproptosis in HCC.

## INTRODUCTION

Copper (Cu) participates in several important biological processes, including oxygen metabolism, iron homeostasis, synthesis of neurotransmitters and antioxidant defense, as a result, it is essential for the survival of our human body [1–3]. A bunch of studies have demonstrated that copper dyshomeostasis, either excess level of copper or deficiency of the ion, is harmful and results in various types of disease [2]. Wilson's disease is a typical one due to overload of copper caused by pathogenic mutations in the ATP7B gene encoding ATP-ase7B, which is ineffective in transporting copper out of the cell [4, 5]. Copper also plays a role in promoting Parkinson's disease, in which copper might lead to accumulation of amyloid fibril, a major component of Lewy bodies [6–8].

The dysregulation of Cu homeostasis in cancer has also been well documented [9–11]. As a key regulator of many signaling pathways and component in various essential enzymes, copper ion is supposed to be a promoter in the carcinogenesis and advancement of multiple types of tumors [9, 12]. Elevated level of copper ion is found in a variety of cancer such as breast cancer, lung cancer, bladder cancer, and head and neck cancer [13–16]. And copper ion could support tumor cell proliferation, metastasis, and angiogenesis [9, 17]. High level of serum copper has also been linked to worse prognosis in some types of cancer like hepatocellular carcinoma (HCC) and breast cancer [18, 19]. Besides, many basic researches and some early-stage clinical trials demonstrated that copper chelators, decreasing Cu concentration in tumor cells, had anti-tumor efficiency [17, 20, 21]. However, elevating Cu concentration in malignant tumors can also produce anti-cancer effect partially due to oxidative stress triggered by excess copper ions [17]. Correspondingly, Cu-containing compounds or Cu ionophores, like disulfiram (DSF) and dithiocarbamates, showed tumor-killing effects both *in vivo* and *in vitro* [17, 22]. In particular, a novel copper-induced cell death, distinct from previously described ways of cell death like

apoptosis, necroptosis, and ferroptosis, has been discovered and termed cuproptosis by Peter Tsvetkov et al. [23]. Cuproptosis is closely associated with protein lipoylation which is concentrated in TCA cycle. The binding of copper to lipoylated components leads to lipoylated protein aggregation and subsequent iron-sulfur cluster protein loss, which causes proteotoxic stress and ultimately cell death [23]. Taken together, dysregulation of Cu homeostasis is generally observed in cancer and could serve as a potential target of anti-cancer therapy by inducing cuproptosis.

Liver plays a central role in regulating the systemic copper homeostasis. After being absorbed from the small intestine and delivered to the liver via portal circulation, copper ion can be released into the blood, transported into the bile for excretion or stored in hepatocytes [17, 24]. Except for its aforementioned functions under physiological processes, copper also involves in the tumorigenesis and development of HCC. An early study indicated that copper contents correlated with liver cirrhosis and HCC, and serum Cu levels might be helpful in detecting HCC [25]. Besides, high level of serum copper was associated with shorter survival of HCC patients [19, 26]. Caroline I Davis et al. observed that expression of Cu transporter genes, such as ATP7A, ATP7B, and SLC31A1, was significantly altered in tumor samples, which might be a cause for elevated Cu levels in the disease [27]. In recent years, position emission tomography (PET) using radioactive copper as a tracer has been explored for the application in HCC, relying on the altered copper metabolism in this tumor [28].

However, our understanding about the impact of abnormal copper metabolism on the development, treatment sensitivity and prognosis of HCC patients is still insufficient. Besides, genes regulating copper metabolism might also involve in cuproptosis and function as targets of anti-tumor therapy. Moreover, in the era of immunotherapy, how the alteration of copper metabolism modulates tumor microenvironment (TME) and the sensitivity to immune checkpoint inhibitors

(ICIs) becomes an interesting question. In this work, we evaluated the alteration of copper metabolism-related pathways in HCC and established a copper metabolism-related risk score (CMscore). The CMscore was helpful in identifying HCC subtypes with distinct prognosis, pathway enrichment features and immune infiltrating signatures. In addition, the impact of CMscore on the sensitivity to transcatheter arterial chemoembolization (TACE) and ICIs was also investigated. Lastingly, WGCNA and subsequently correlation analysis revealed that SLC27A5 might regulate cuproptosis via FDX1 in HCC.

## MATERIALS AND METHODS

### Public data acquisition and processing

The data of the liver hepatocellular carcinoma project from the Cancer Genome Atlas (TCGA-LIHC) and from the International Cancer Genome Consortium (ICGC) database was downloaded as reported in our previous studies [29, 30]. The series matrix files and corresponding platform information of GSE14520, GSE25097, and GSE64041 were downloaded from Gene Expression Omnibus (GEO) database by the GEOquery package of R software. Data cleaning and processing was conducted as reported in our previous study [30]. The clinical information and gene expression data of the imvigor210 cohort were downloaded from the online website (<http://research-pub.gene.com/IMvigor210CoreBiologies/>) and was processed according to the instruction from the website. The data of patients with metastatic melanoma receiving immune-checkpoint inhibitor (ICI) was downloaded from the Supplementary Materials section of the work by David Liu et al. [31]. Since the data used in this study are all open data in public databases, an extra ethical approval was not required.

### Construction of copper metabolism-related risk score (CMscore)

The information of 14 copper metabolism-related pathways was downloaded from the Gene Set Enrichment Analysis (GSEA) website (<https://www.gsea-msigdb.org/gsea>, Supplementary Table 1). A total of 134 copper metabolism-related genes were identified (Supplementary Table 2. Univariate Cox regression analyses of these genes in both TCGA-LIHC and GSE14520 datasets were conducted and those genes with a prognostic significance less than 0.1 in both datasets were then input into a Least absolute shrinkage and selection operator (LASSO) regression model in the GSE14520 dataset, as reported in other studies [32, 33]. The parameters of the glmnet package to conduct LASSO regression analysis were set as follows: family

= 'cox', nfolds = 10, type.measure = 'deviance'. The generated crucial genes further underwent multivariate Cox regression analysis, which generated a coefficient of each crucial gene. A score of each sample was generated by multiplying the transcriptional value of each gene and its corresponding coefficient, and the calculation method was described below: score = -0.1984 \* SORD - 0.1939 \* Tmprss6 - 0.1341 \* CCS + 0.8732 \* P2RX4 + 0.5949 \* ATP13A2 + 0.6326 \* LOX. The copper metabolism-related risk score (CMscore) was calculated with the formula reported in our previous study, namely, CMscore = (score-Min) / absolute (Max) [29].

### Enrichment analysis

The molecular function analysis of 134 copper related genes was conducted via the ClueGo application in the Cytoscape software [34]. Gene set variation analysis (GSVA) of the 14 copper metabolism-related pathways in HCC and corresponding normal liver samples was performed by the 'GSEABase' and 'GSVA' packages in R software [35]. GSEA of CMscore-based classification of HCC patients was performed as described in our previous works [36].

### Immune profile analysis

The immune score, stromal score and tumor purity of patients from TCGA-LIHC dataset was calculated by the 'estimate' package in R software [37]. The infiltration ratio of 22 types of immune cells in tumor microenvironment (TME) was calculated by CIBERSORT algorithm in R software [37]. The TIMER2.0 website (<http://timer.cistrome.org/>) also provided online evaluation of the fraction of 6 types of immune cells and the analyses were conducted in accordance with the instruction on the website [38].

### Weighted gene co-expression network analysis (WGCNA)

WGCNA was conducted in R software as reported in our previous study [33, 39]. Briefly, the transcriptional expression data of each dataset were used to construct a gene co-expression network after removing genes and samples with too many missing values. The correlation strength between the nodes was calculated by constructing an adjacency matrix based on the following formula:

$$S_{ij} = \left| \text{cor} \left( x_i, x_j \right) \right| a_{ij} = S_{ij}^{\beta}$$

$S_{ij}$  means the co-expression similarity and represents the Pearson's correlation coefficient between two different

genes  $i$  and  $j$ .  $X_i$  and  $X_j$  are the corresponding transcriptional expression values of the genes  $i$  and  $j$ , and  $\alpha_{ij}$  is the correlation strength between the two genes. The scale-free  $R^2$  was set as 0.9 to select the corresponding soft-threshold  $\beta$ . One-step network construction and module detection methods were subsequently used, with a relatively large minimum module size of 200 and mergeCutHeight setting as 0.25 for the merging of modules. Finally, module–trait associations were quantified to identify modules significantly associated with CMscore. Besides, the definition and expression of module eigengenes (MEs), the gene significance (GS), and the module significance (MS) were similar to what had been described in a previous study [40].

### Immunohistochemistry (IHC) staining

Paraffin-embedded primary liver cancer tissues and the corresponding adjacent nontumorous samples ( $n = 46$ ) were obtained from the Pathology Department of Shanxi Provincial People's Hospital. Patients' information was exhibited in Supplementary Table 1. The HCC samples and corresponding tumor adjacent normal tissues were fabricated into a tissue chip. IHC staining of FFPE sections was performed as described in our previous studies [41, 42]. IHC samples were scored by two independent pathologists, according to criteria used in previous published studies [43, 44].

### Cell culture and treatment

Human liver cancer HepG2 and LM-3 cells were obtained from Cell Bank of Shanghai Institute for Biological Sciences, Chinese Academy of Sciences. Cells were cultured in DMEM medium, containing 10% FBS, and maintained in an incubator with constant temperature and CO<sub>2</sub>. Transfection was performed using EZ Trans Lipo (AC04L071, Life-iLab). The plasmids were acquired from Tianrun Aoke Biotechnology Co., Ltd (Yangling, China). The use of live cancer cells was approved by the Ethics Committee of Shanxi Provincial People's Hospital (2021-196).

### CCK-8 assay

In order to detect the effect of overexpression of SLC27A5 on the proliferation ability of liver cancer cells, HepG2 and LM-3 cells were seed into the 96-well plates, and treated with CCK-8 reagent (AC11L054, Life-iLab) at 0, 24, 48, and 72 hours, respectively. To detect the sensitivity of liver cancer cells to cuproptosis after overexpression of SLC27A5, HepG2 and LM-3 cells were in the 96 well plates, and treated with CCK-8 reagent 48 hours later. The absorbance value at a

wavelength of 450 nm was measured using an enzyme labeling instrument.

### Western blotting

HepG2 and LM-3 cells were seeded into 6-well plates and conduct normal culture. Cells are collected when their density reaches 80%. RIPA lysate was used to lyse cells and obtain supernatant by centrifugation. The BCA kit (P0010, Beyotime) was used to determine the protein concentration. Western blotting was performed using antibodies against FDX1 (M05441, Boster), SLC27A5 (A09287-2, Boster), GAPDH (BM3876, Boster). Horseradish peroxidase-labeled Goat anti-rabbit IgG (H+L) (BA1039, Boster) was used as secondary antibodies.

### qRT-PCR

HepG2 and LM-3 cells were seeded into 6-well plates and conduct normal culture. Cells are collected when their density reaches 80%. TRIzol (AN51L758, Life-iLab) was used to lyse cells to obtain total RNA. BeyoRT™ II cDNA First Strand Synthesis Kit (D7168M, Beyotime) was used to obtained cDNA. 2x qPCR Mix (AN19L918, Life-iLab) was used to perform qPCR. The primers of target genes are as follows:

FDX1 forward, 5'-GTTCAACCTGTCACCTCATCTT-3';  
FDX1 Reverse 5'-CCAACCGTGATCTGTCTGTTAG-3';  
SLC27A5 forward, 5'-AGAGGACCGGACACATACA-3';  
SLC27A5 Reverse 5'-GTAGACTTCCCAGATCCGAATAG-3';  
GAPDH forward, 5'-GTCAAGGCTGAGAACGGGAA-3';  
GAPDH Reverse 5'-AAATGAGCCCCAGCCTTCTC-3'.

### Wound healing assay

HepG2 and LM-3 cells were seeded into 6-well plates and conduct normal culture. When the cell density reaches 80%, a 200  $\mu$ L sterile pipette tip was used to scratch the cell layer and form a wound. The closure of the gap was imaged at designated time intervals using a microscope.

### Cell cycle assay

HepG2 and LM-3 cells were seeded into 6-well plates and subjected to starvation treatment for 12 hours, followed by normal cultivation for 24 hours. Cells were treated using a cell cycle assay kit plus (AC12L553,

Life-iLab) and detected using flow cytometry. The difference between groups was detected by t-test.

### EdU staining

HepG2 and LM-3 cells were seeded into a special dish for confocal laser scanning microscopy. Cells were subjected to starvation treatment using a culture medium containing 1% FBS for 24 hours, followed by a complete culture medium and continued cultivation for 24 hours. BeyoClick™ EdU-555 Cell Proliferation Detection Kit (Beyotime, C0075L) was used for labeling Proliferated Cells, and DAPI was used to label the nucleus, then detected by confocal laser scanning microscopy.

### Statistical analysis

The data analyses and visualization were conducted in R (version 4.1.1), by using the following packages: ‘tidyverse’, ‘GEOquery’, ‘ggplot2’, ‘ggplotify’, ‘plot3D’, ‘dplyr’, ‘plyr’, ‘maftools’, ‘limma’, ‘survival’, ‘survminer’, ‘survivalROC’, ‘timeROC’, ‘cowplot’, ‘clusterProfiler’, ‘Hmisc’, ‘gridExtra’, ‘GSVA’, ‘corrplot’, ‘gmodels’, ‘VennDiagram’, and ‘pheatmap’. Wilcoxon test was used for comparison between two groups, whereas ANOVA test was for comparison among three groups. The Kaplan-Meier method was manipulated for prognosis analysis. Based on the optimal cutoff value of a marker determined by the ‘survminer’ package in R, HCC patients were divided into two subgroups [32, 45]. A *p*-value less than 0.05 was considered statistically significant (\*, *p* < 0.05; \*\*, *p* < 0.01; \*\*\*, *p* < 0.001; \*\*\*\*, *p* < 0.0001).

## RESULTS

### Distinct features of HCC in copper metabolism-related pathways

Previous studies suggested that copper is tightly associated with liver cirrhosis and development of HCC, and with the survival of HCC patients [19, 25, 46]. To investigate the role of copper metabolism in HCC, we searched GSEA website online with the keyword “copper” and identified 14 copper metabolism-related pathways containing 134 unique genes (Supplementary Tables 2, 3). The GSVA enrichment analyses of these 14 pathways in HCC and corresponding normal liver samples revealed that HCC samples exhibited decreased level of most copper metabolism-related pathways, like “GOMF\_COPPER\_ION\_TRANSMEMBRANE\_TRANSPORTER\_ACTIVITY”, “GOBP\_RESPONSE\_TO\_COPPER\_ION”, “GOBP\_DETOXIFICATION\_OF\_COPPER\_ION”, and “GOBP\_COPPER\_ION\_IMPORT” (Figure

1A and supplementary Figure 1A, 1B). Correspondingly, most copper import related genes (Figure 1C) and detoxification of copper ion related genes (Figure 1D) were significantly downregulated in HCC, when compared with normal liver tissues. A previously study indicated that liver tissues with cirrhosis showed an accumulation of copper when compared with healthy ones [47]. We noticed that liver tissues with cirrhosis had a further increased level than HCC and normal tissues in some terms like “GOMF\_COPPER\_ION\_TRANSMEMBRANE\_TRANSPORTER\_ACTIVITY”, “GOBP\_COPPER\_ION\_TRANSMEMBRANE\_TRANSPORT”, and “GOBP\_COPPER\_ION\_TRANSPORT” (Figure 1B), probably reflecting a response of cirrhotic tissues to the elevated level of copper ions. Taken together, these results indicated that HCC might show resistance to copper ion influx and decreased capability of detoxification of copper ion.

Copper ion plays a critical role in mitochondrial respiration, antioxidant defense, biosynthesis of neurotransmitters and other biological activities [48]. In addition to copper ion binding and transporting, these 134 copper metabolism-related genes were also found to be enriched in molecular functions like “oxidoreductase activity”, “heat shock protein binding”, and “cyclin dependent protein serine/threonine kinase activity” (Figure 1E). KEGG analyses revealed that these genes involved in mineral absorption and in other terms like prostate cancer, colorectal cancer, platinum drug resistance, and ferroptosis (Figure 1F).

### Construction and validation of copper metabolism-related risk score (CMscore)

Since copper concentration shows correlation with survival of HCC patients and high level of copper in cytoplasm could induce cuproptosis [19, 23], we hypothesized that copper metabolism-related genes might help to identify specific subtypes with distinct prognosis and sensitivity to copper-dependent death. We first conducted univariate Cox regression analyses of these 134 copper metabolism-related genes in TCGA-LIHC and GSE14520 datasets, and found 13 genes showed prognostic significance with *p*-value less than 0.1 in both datasets (Figure 2A). The 13 genes were then input into a LASSO regression model in the GSE14520 dataset and 6 crucial genes were obtained (Figure 2B, 2C). A novel risk score, which was named CMscore were calculated by the method described in the Method and Materials Section. As shown in Figure 2D, patients with high CMscore had lower expression of TMPRSS6, SORD and CCS, whereas had higher expression of P2RX4, ATP13A2 and LOX. In addition, TMPRSS6, SORD and CCS all showed significantly

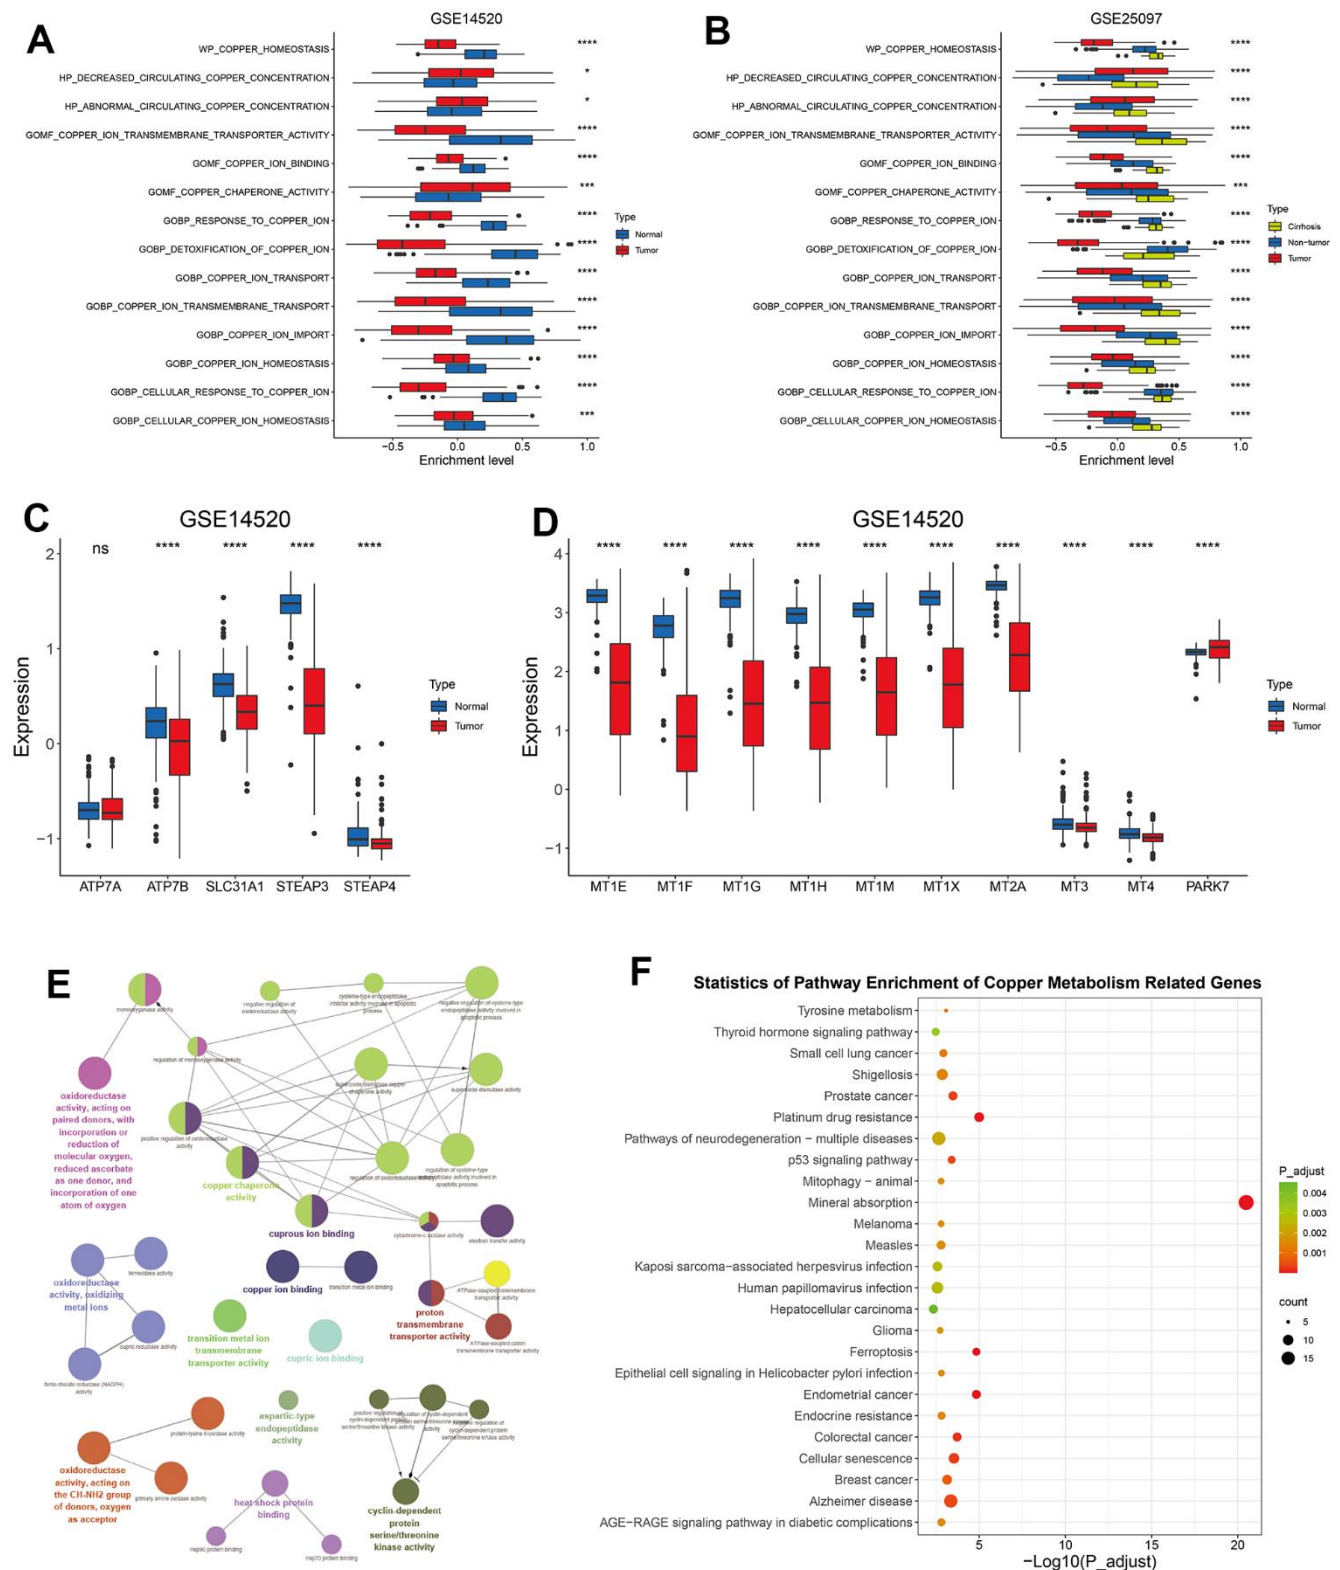

**Figure 1. The alteration of copper metabolism in HCC.** (A) The box plot showing the enrichment level of 14 copper metabolism in tumor and corresponding normal tissues from GSE14520 dataset. (B) The box plot showing the enrichment level of 14 copper metabolism in tumor, cirrhotic and normal livers from GSE25097 dataset. (C, D) The box plot showing the expression of copper ion import (C) or detoxification of copper ion (D) related genes in tumor and normal livers from the GSE14520 datasets. (E) The molecular function analysis of 134 copper metabolism-related genes in the GlueGo plug-in of the Cytoscape software. (F) KEGG analysis of 134 copper metabolism-related genes. P-values were shown as \* $p < 0.05$ , \*\* $p < 0.01$ , \*\*\* $p < 0.001$ , and \*\*\*\* $p < 0.0001$ .

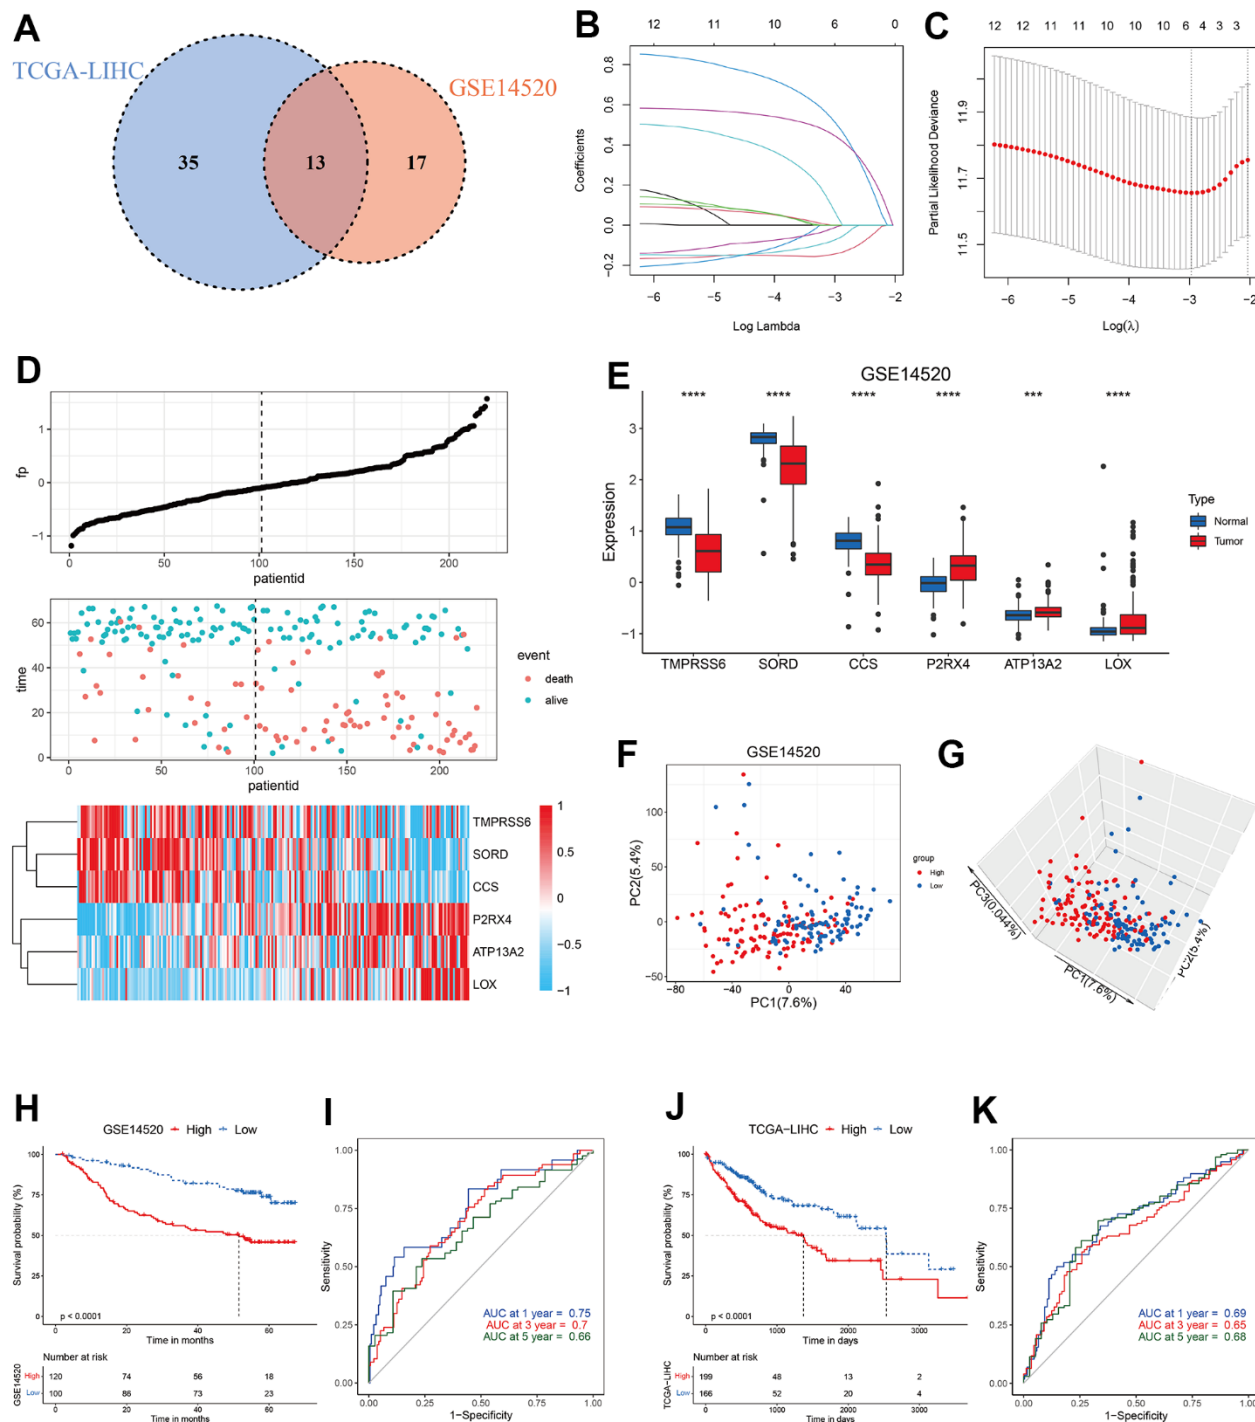

**Figure 2. Construction of CMscore.** (A) Venn diagram indicating 13 copper metabolism-related genes with prognostic significance less than 0.1 in GSE14520 and TCGA-LIHC datasets. (B, C) The LASSO Cox regression model was constructed from 13 copper metabolism-related genes. The tuning parameter ( $\lambda$ ) was calculated based on the partial likelihood deviance with ten-fold cross validation. An optimal log  $\lambda$  value shown by the vertical black dot-lines in the plots. The six signature genes were identified according to the best fit profile. (D) The distribution and optimal cutoff value of CMscore, the OS status of each sample, and the expression value of the six crucial genes in the GSE14520 dataset. (E) The box plot showing the expression of six crucial genes in tumor and normal livers from the GSE14520 datasets. (F, G) The 2D (F) and 3D (G) plots of the PCA of the GSE14520 dataset based on the expression profiles of the 6 signature genes. (H) The prognostic significance of CMscore in GSE14520. The Kaplan-Meier method was used for prognosis analysis. (I) Time-dependent ROC analyses of the CMscore regarding the OS and survival status in the GSE14520 dataset. (J) The prognostic significance of CMscore in TCGA-LIHC. The Kaplan-Meier method was used for prognosis analysis. (K) Time-dependent ROC analyses of the CMscore regarding the OS and survival status in the TCGA-LIHC dataset. P-values were shown as \* $p < 0.05$ , \*\* $p < 0.01$ , \*\*\* $p < 0.001$ , and \*\*\*\* $p < 0.0001$ .

decreased expression in HCC (Figure 2E) and their high expression was correlated with longer survival time (Supplementary Figure 1C–1E). On the contrary, P2RX4, ATP13A2 and LOX showed significantly upregulated level in HCC (Figure 2E) and their high expression was correlated with dramatically shorter survival time (Supplementary Figure 1F–1H). PCA analyses revealed that HCC patients with high- or low-CMscore were distinctly clustered (Figure 2F, 2G). In the GSE14520 datasets, HCC patients with low CMscore (100/220, 45.45%) had considerably longer median overall survival (OS) than those with high CMscore (not reached vs. 51.60 months,  $p < 0.0001$ , Figure 2H), and the AUC reached 0.75 at 1 year, 0.7 at 3 years, and 0.66 at 5 years (Figure 2I). Likely, when 45.45% of HCC patients in the TCGA-LIHC and ICGC-LIRI datasets were classified into the low-CMscore subgroup according to the order of CMscore, these patients also exhibited significantly longer OS ( $p < 0.0001$  or  $= 0.008$ , respectively, Figure 2J and Supplementary Figure 2A). The AUC of 1-year, 3-year and 5-year reached 0.69, 0.65, and 0.68 in the TCGA-LIHC, respectively (Figure 2K). And that of 1-year and 3-year was 0.76 and 0.67 in the ICGC-LIRI dataset (Supplementary Figure 2B). In addition, HCC patients with low CMscore also had significantly longer progression free survival (PFS,  $p = 0.0012$  or  $= 0.028$ , respectively, Supplementary Figure 2C, 2D).

### CMscore serves as an independent risk score

To further evaluate the impact of CMscore on prognosis of HCC patients, we conducted univariate Cox analyses and subsequently multi-variate Cox analyses in GSE14520 and TCGA-LIHC, including CMscore and available clinical factors (Figure 3A–3D). The results showed that CMscore was an independent prognostic factor in both datasets, after correction for other confounding clinical features ( $p < 0.001$ , Figure 3B, 3D). Indeed, except female patients, HCC patients with high CMscore had significantly shorter OS in subgroup prognostic analyses (Figure 3E, 3H), supporting an independent role of CMscore in the survival of HCC patients.

We also analyzed the associations between CMscore and clinicopathological features of these patients. As shown in Table 1, although a higher percentage of HCC patients in the low CMscore subgroup were  $\geq 60$  years in the GSE14520 dataset, such a significant association was not observed in the TCGA-LIHC dataset ( $p = 0.528$ ). A similar inconsistency was also observed between CMscore and gender (Table 1). Besides, CMscore showed no association with the fibrosis or cirrhosis state of HCC patients ( $p = 0.806$  or  $> 0.999$ ). However, a significantly higher percentage of HCC

patients with high CMscore had AFP level great than 300 ng/ml ( $p < 0.001$ ), were at advanced stage (III/IV or BCLC B/C stage, Table 1), and had worse histologic grade (G3 or G4,  $p = 0.002$ , Table 1).

### Pathway enrichment analyses

Cuproptosis is recently identified copper-independent cell death in which excess copper promotes the aggregation of lipoylated proteins and subsequent proteotoxic stress [23]. Currently, 10 genes have been showed to regulate the sensitivity of cuproptosis. Among these genes, FDX1, LIAS, LIPT1, DLD, DLAT, PDHA1, and PDHB are found to facilitate cuproptosis, whereas MTF1, GLS and CKDN2A inhibit the cell death [23]. As shown in Figure 4A, most pro-cuproptosis genes, like FDX1, LIAS and PDHB, were significantly downregulated in HCC patients with high CMscore, whereas GLS, an anti-cuproptosis gene, was significantly upregulated in these patients. Peter Tsvetkov et al. also found that cells more reliant on mitochondrial respiration show a dramatically increase in sensitivity to copper ionophores than those undergoing glycolysis and growing cells in hypoxic conditions led to attenuation of cuproptosis [23]. We noticed that most glycolysis related genes showed a significantly higher expression in HCC patients with high CMscore (Figure 4B). Taken together, these results indicated that HCC patients might be more resistant to cuproptosis.

GSEA analyses revealed that HCC patients with high CMscore were enriched in cancer-related pathways like mitotic nuclear division, meiotic cell cycle process, WNT signaling pathway, and ERBB signaling pathway (Figure 4C–4F and Supplementary Table 4), and in immune related pathways like positive regulation of leukocyte cell cell adhesion (Figure 4G–4J, Supplementary Table 4), whereas patients with low CMscore were enriched in metabolism-related pathways like organic acid catabolic process and lipid oxidation (Figure 4K–4N and Supplementary Table 5).

### Immune landscape of CMscore stratified HCC patients

To better character the immune landscape of HCC patients stratified by CMscore, we first calculate the immune score, stromal score and tumor purity of each sample in the TCGA-LIHC dataset. As shown in Figure 5A–5C, HCC patients with high CMscore had significantly higher immune score and stromal score, and correspondingly lower tumor purity. A significantly positive correlation was observed between CMscore and B cell memory, T cell follicular helper, T cells regulatory, or M0 macrophages (Figure 5D). On the

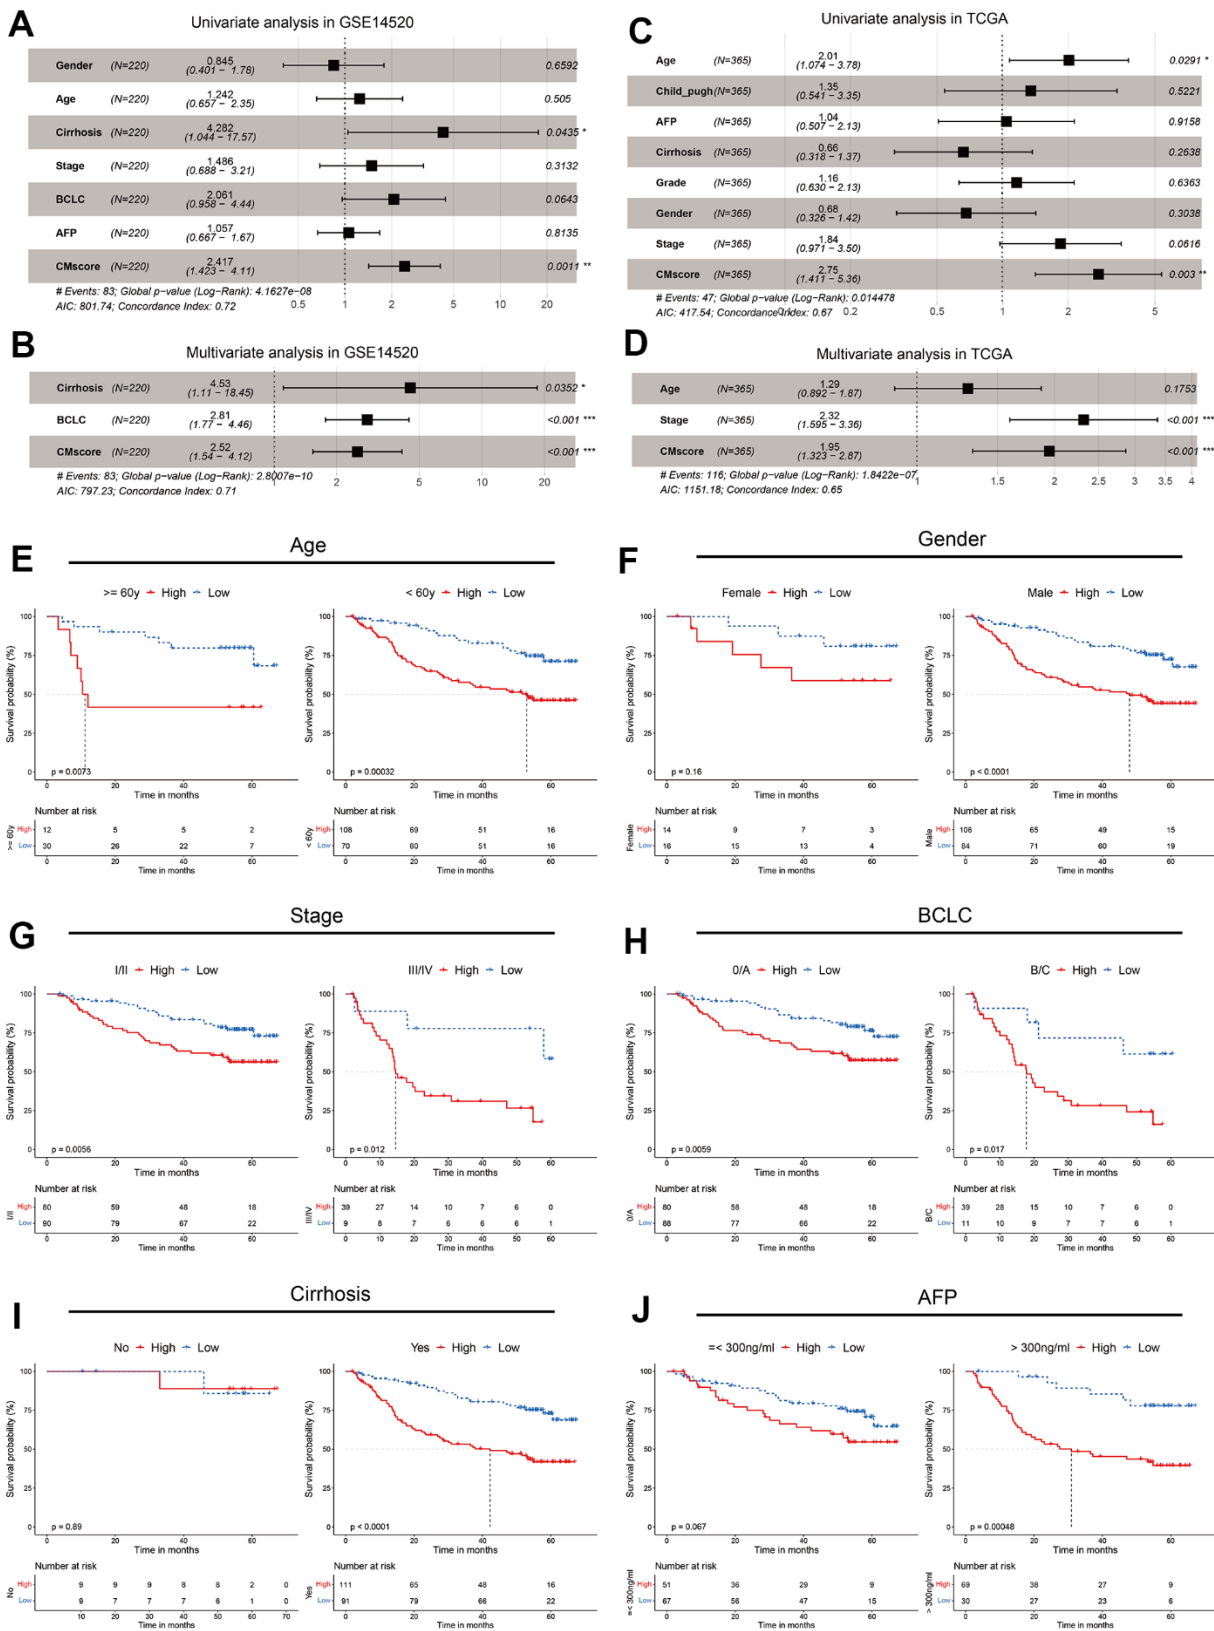

**Figure 3. CMscore was an independent prognostic predictor for HCC patients.** (A, B) Results of the univariate (A) and multivariate (B) Cox regression analyses regarding OS in the GSE14520 cohort. (C, D) Results of the univariate (C) and multivariate (D) Cox regression analyses regarding OS in the TCGA-LIHC cohort. (E-J) Prognostic analyses of CMscore in subgroups of HCC patients stratified by age (E), gender (F), stage (G), BCLC stage (H), cirrhosis status (I) and AFP level (J).

**Table 1. Relationships between CMscore and clinicopathological features of HCC patients.**

|                    |        | GSE14520    |              |         | TCGA        |              |         |
|--------------------|--------|-------------|--------------|---------|-------------|--------------|---------|
|                    |        | Low CMscore | High CMscore | p-value | Low CMscore | High CMscore | p-value |
| Age                | <60    | 70          | 108          | < 0.001 | 72          | 93           | 0.528   |
|                    | ≥60    | 30          | 12           |         | 94          | 106          |         |
| Gender             | male   | 84          | 106          | 0.431   | 125         | 121          | 0.004   |
|                    | female | 16          | 14           |         | 41          | 78           |         |
| Fibrosis/Cirrhosis | No     | 9           | 9            | 0.806   | 39          | 35           | > 0.999 |
|                    | Yes    | 91          | 111          |         | 72          | 63           |         |
| AFP(ng/ml)         | ≤300   | 67          | 51           | < 0.001 | 118         | 94           | < 0.001 |
|                    | >300   | 30          | 69           |         | 20          | 44           |         |
| Stage              | I/II   | 90          | 80           | < 0.001 | 126         | 128          | 0.018   |
|                    | III/IV | 9           | 39           |         | 30          | 57           |         |
| BCLC               | 0/A    | 88          | 80           | < 0.001 |             |              |         |
|                    | B/C    | 11          | 39           |         |             |              |         |
| Child_pugh         | A      |             |              |         | 118         | 65           | > 0.999 |
|                    | B/C    |             |              |         | 12          | 7            |         |
| Histologic_grade   | G1+G2  |             |              |         | 119         | 111          | 0.002   |
|                    | G3+G4  |             |              |         | 45          | 85           |         |

contrary, CMscore showed a significantly negative correlation with T cells CD4 naïve, T cells gamma delta, NK cells activated, monocytes, M1 or M2 macrophages, and mast cells resting (Figure 5D).

Alexander Bagaev et al. clustered TME properties via a list of 29 functional gene expression signatures (Fges) [49]. We found that HCC patients with high CMscore had elevated expression of most Fges associated with angiogenesis fibroblasts (CAFs), such as angiogenesis, matrix remodeling, and protumor cytokines. Besides, the expression of all pro-tumor immune infiltrate associated Fges and part of anti-tumor immune infiltrate associated Fges (MHCI, MHCII, coactivation molecules, B cells, checkpoint inhibition, and T cells) were significantly elevated in HCC patients with high CMscore a higher proliferation rate (Figure 5D). In addition, high-CMscore HCC patients also showed an increase in proliferation rate (Figure 5D), which is consistent with the GSEA results (Figure 4C, 4D).

Tumor Immune Estimation Resource (TIMER; [cistrome.shinyapps.io/timer](http://cistrome.shinyapps.io/timer)) helps to calculate the levels of six tumor-infiltrating immune subsets, namely B cell, CD4+ T cell, CD8+ T cell, neutrophil, myeloid dendritic cell and macrophage [50]. We also found that CMscore exhibited a positive association with the infiltration of all these cells (Figure 5F–5K). In particular, CMscore had a strong correlation with the fraction of myeloid dendritic cell or macrophage ( $R = 0.55$  or  $= 0.54$ , respectively, Figure 5J, 5K).

#### Association between CMscore and treatment of HCC

TACE, a recommended treatment for HCC patients at intermediate stage, exerts anti-tumor function by injecting drugs into the artery supplying for HCC nodules [51]. We noticed that HCC patients responding to TACE had a significantly lower level of CMscore ( $p < 0.0001$ , Figure 6A), and the AUC of CMscore in predicting the non-responsiveness reached 0.759 (Figure 6B). As demonstrated in our previous section, HCC patients with high CMscore had increased proliferation rate (Figure 5E), and decreased expression of pro-cuproptosis related genes (Figure 4A). Similarly, HCC patients responding to TACE had significantly higher level of MKI67, a marker of cell proliferation, and of CDKN2A, an anti-cuproptosis gene (Supplementary Figure 2F), and these patients also had significantly decreased expression of FDX1, a key pro-cuproptosis gene (Supplementary Figure 2F).

Besides, immune checkpoint inhibitors (ICIs), like pembrolizumab, nivolumab and sintilimab, have become part of the first- or second-line therapy for advanced HCC patients [52, 53]. As shown in Figure 6C, HCC patients with high CMscore had a significantly higher expression of all major ICI targets, including PD-L1, CTLA4, CD24 and TIGIT. Previously, a series of stepwise events is depicted by Liwen Xu et al. during the anticancer immune response [54]. As shown in Figure 6D, CMscore had a

significantly negative association with step 5 to step 7, whereas showed a significantly positive correlation with the release of cancer cell antigens (step 1), and recruiting of many types of immune cells (step 4). To further evaluate the impact of CMscore on tumor's response to immunotherapy, we first investigated a large cohort of patients with metastatic urothelial cancer (mUC) treated with atezolizumab, an anti-PD-L1 agent (the IMvigor210 study) [55]. We calculated the CMscore of each sample in the cohort and 45.45% of these patients were classified into the low-CMscore

subgroup based on the order of CMscore, as described in the aforementioned section. Similarly, mUC patients with high CMscore had significantly decreased level of most pro-cuproptosis related genes such as LIAS, LIPT1 and DLD, and upregulated level of CDKN2A, an anti-cuproptosis gene (Figure 6E). Besides, mUC patients from the inflamed cluster, or those with TC2+, had the highest level of CMscore (Figure 6F and Supplementary Figure 2G). CMscore also showed a positive correlation with CD8 T effector cell score and level of immune checkpoint (Figure 6H, 6I), and these

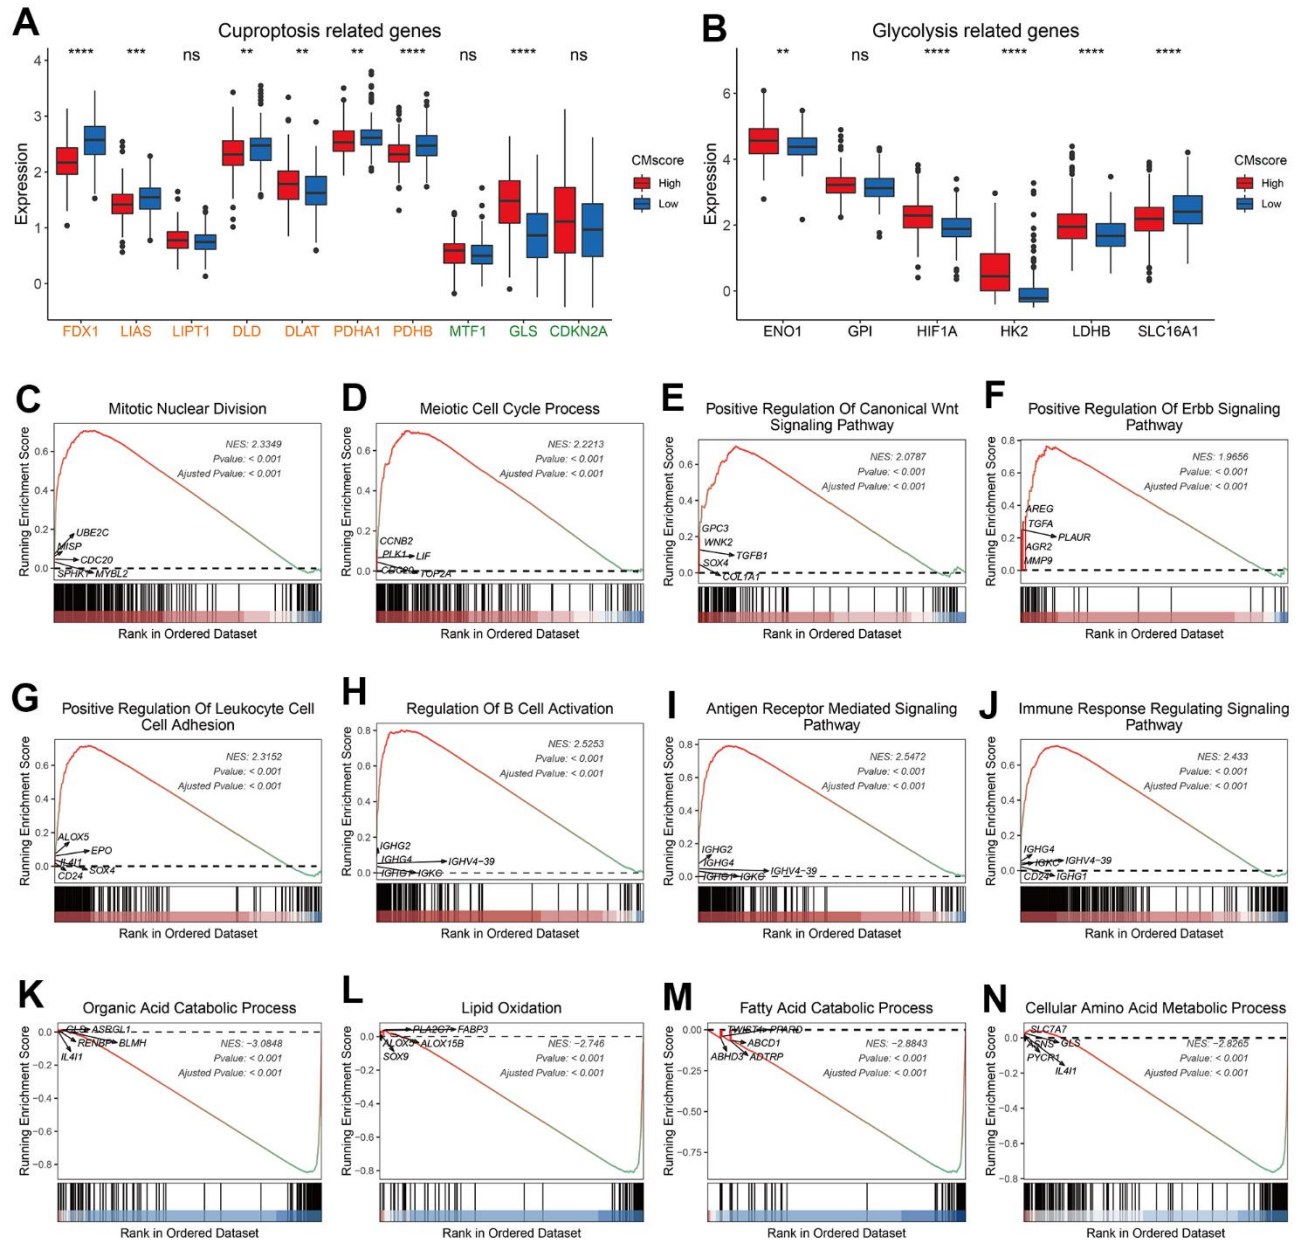

**Figure 4. Pathway enrichment analyses of CMscore-based HCC groups.** (A, B) The box plot showing the expression of cuproptosis (A) and glycolysis (B) related genes in high- and low-CMscore subgroups of the TCGA\_LIHC dataset. (C–N) GSEA of the high- (D) and low-CMscore (E) subgroup in the TCGA-LIHC cohort. P-values were shown as \* $p < 0.05$ , \*\* $p < 0.01$ , \*\*\* $p < 0.001$ , and \*\*\*\* $p < 0.0001$ .

results were consistent with those from the HCC cohort (Figures 5E, 5H, 6C). After treatment of atezolizumab, mUC patients from the high-CMscore subgroup exhibited significantly longer OS than those from the low-CMscore one (median OS, 14.13 months vs. 8.08 months,  $p = 0.011$ , Figure 6J). In another large cohort in which 144 patients with metastatic melanoma treated with anti-PD1 ICIs (121 of them with survival data available) [31], we also calculated the CMscore of each sample and categorized 45.45% of them into the low-CMscore subgroup. Again, we found that melanoma patients with high CMscore had significantly lower tumor purity (Figure 6K), consistent with the results from the HCC cohort (Figure 5C). Particularly, these melanoma patients with low CMscore exhibited dramatically shorter OS ( $p = 0.00072$ , Figure 6L) and PFS ( $p < 0.0001$ , Figure 6M).

### Identification of potential target of cuproptosis

To identify potential genes involving copper metabolism and cuproptosis, WGCNA was applied to identify modules highly correlated with CMscore in both GSE14520 and TCGA-LIHC datasets (Figure 7A, 7B). The turquoise modules in the GSE14520 and TCGA-LIHC datasets showed strongest association with CMscore (Figure 7C–7E). To filter the hub genes highly correlated with CMscore, we selected genes which had a gene significance value greater than 0.2 and module membership value greater than 0.8 for further analyses. As shown in Figure 7F, 13 hub genes both existed in the turquoise modules of TCGA-LIHC and GSE14520 datasets, and these genes all showed a strong correlation with CMscore (Figure 7G).

Since SLC27A5 showed the strongest negative correlation with CMscore (Figure 7G), we further evaluated its relationship with cuproptosis. As shown in Figure 8A–8D, the transcriptional and protein level of SLC27A5 were significantly downregulated in HCC when compared with normal tissues. To investigate the role of SLC27A5 in liver cancer, we overexpressed SLC27A5 in HepG2 and LM-3 cells. CCK-8 assay indicated that overexpression SLC27A5 caused decreased cell proliferation of HCC cells (Figure 8E, 8F). The results of flow cytometry suggested that the proportion of S phase HCC cells decreased after overexpression of SLC27A5 (Figure 8G, 8H). EdU staining results also showed a significant decrease in the proliferation rate of HCC cells after overexpression of SLC27A5 (Figure 8I). Besides, HCC cells with overexpression of SLC27A5 showed a slower migration rate than the control groups (Figure 8J). Considering FDX1 plays a central role in the induction of cuproptosis [23], we further investigated the relationship between SLC27A5 and FDX1. The transcriptional

level of SLC27A5 exhibited a strong positive correlation with that of FDX1 in TCGA-LIHC (Figure 9A,  $r = 0.58$ ,  $p < 2.2e-16$ ) and in GSE14520 (Figure 9B,  $r = 0.44$ ,  $p < 6.7e-12$ ). Further, analysis of the Cancer Dependency Map Portal (DepMap) [56] revealed that SLC27A5 exhibited a significant co-dependency with FDX1 (Figure 9C,  $r = 0.19$ ,  $p = 1.7e-10$ ). IHC staining of SLC27A5 and FDX1 in a collected HCC tissue chip also confirmed a significantly positive correlation between the expression of SLC27A5 and that of FDX1 (Figure 9D, 9E,  $r = 0.65$ ,  $p = 1.5e-06$ ). Lastly, the qRT-PCR and western blotting experiments all confirmed that both transcriptional and protein level of FDX1 were significantly upregulated in HCC cells after overexpression SLC27A5 (Figure 9F–9I). These findings indicate that SLC27A5 may promote cuproptosis by upregulating FDX1 in HCC.

### DISCUSSION

Copper ion is essential in various biological activities, including cellular respiration, intracellular signaling transduction, neuropeptide processing, cell proliferation and angiogenesis [9, 11]. Dysregulated copper metabolism has been observed in many types of cancer, and elevated copper level is associated with more aggressive features of tumor and worse prognosis of cancer patients [11, 13, 14, 26]. In this work, we noticed that features of copper metabolism in HCC are indeed distinct from normal or cirrhotic livers (Figure 1A–1D). GSVA analyses of 14 copper metabolism-related pathways showed that HCC samples had decreased expression of most terms, like “GOMF\_COPPER\_ION\_TRANSMEMBRANE\_TRANSPORTER\_ACTIVITY”, “GOBP\_RESPONSE\_TO\_COPPER\_ION”, “GOBP\_DETOXIFICATION\_OF\_COPPER\_ION”, and “GOBP\_COPPER\_ION\_IMPORT” (Figure 1A, 1B). The expression of four metal-binding metallothioneins (MTs): MT1, MT2, MT3, and MT4, was all dramatically decreased in HCC samples (Figure 1D). MTs can detect, store, and transport copper, and protect cells from copper toxicity by chelating excess copper ions [57]. The abnormal expression of MTs might contribute to the dysregulated copper metabolism in HCC cells and also render these cells more susceptible to copper-dependent cell death, namely cuproptosis [23].

To better characterize the change of copper metabolism in HCC, we incorporated the genes involved in copper metabolism-related pathways, and constructed the novel risk score, namely CMscore (Figure 2A–2D). The risk score was based on the expression of six crucial genes, and these genes were TMPRSS6, SORD, CCS, P2RX4, ATP13A2 and LOX. The first three genes might function as tumor-suppressors in HCC, since they

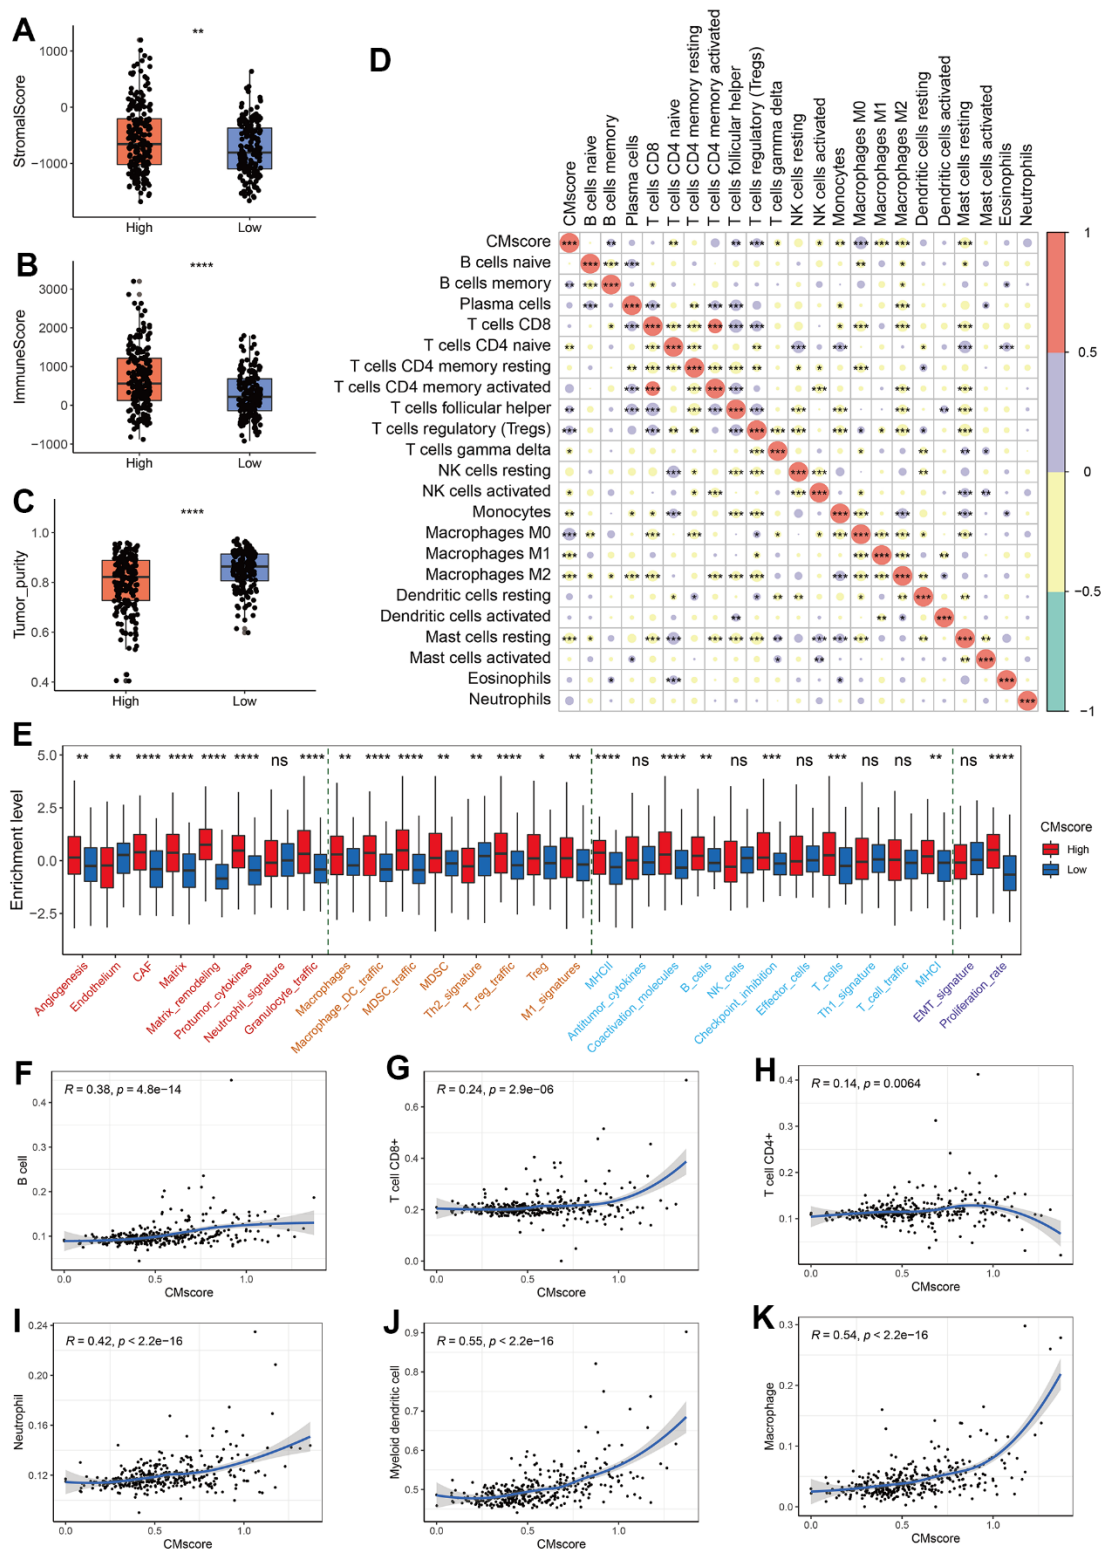

**Figure 5. Immune profile of CMscore-based HCC groups.** (A–C) Box and dot plot showing stromal score (A), immune score (B), and tumor purity of HCC patients from high- and low-CMscore subgroups. Wilcoxon test was used for data analyses. (D) Correlation analyses between CMscore and infiltration of 22 types of immune cells estimated by CIBERSORT method. (E) The box plot showing the enrichment score of 29 Fregs in HCC patients from the low- or high-CMscore subgroups. The “Angiogenesis Fibroblasts” related terms were marked with red font, the “Pro-tumor immune infiltrate” related terms were with yellow font, the “Anti-tumor immune infiltrate” related terms were with blue font, and “EMT signature / proliferation rate” related terms were with purple font. (F–K) Correlation analyses between CMscore and infiltration of 6 types of immune cells estimated by the TIMER website online. P-values were shown as \* $p < 0.05$ , \*\* $p < 0.01$ , \*\*\* $p < 0.001$ , and \*\*\*\* $p < 0.0001$ .

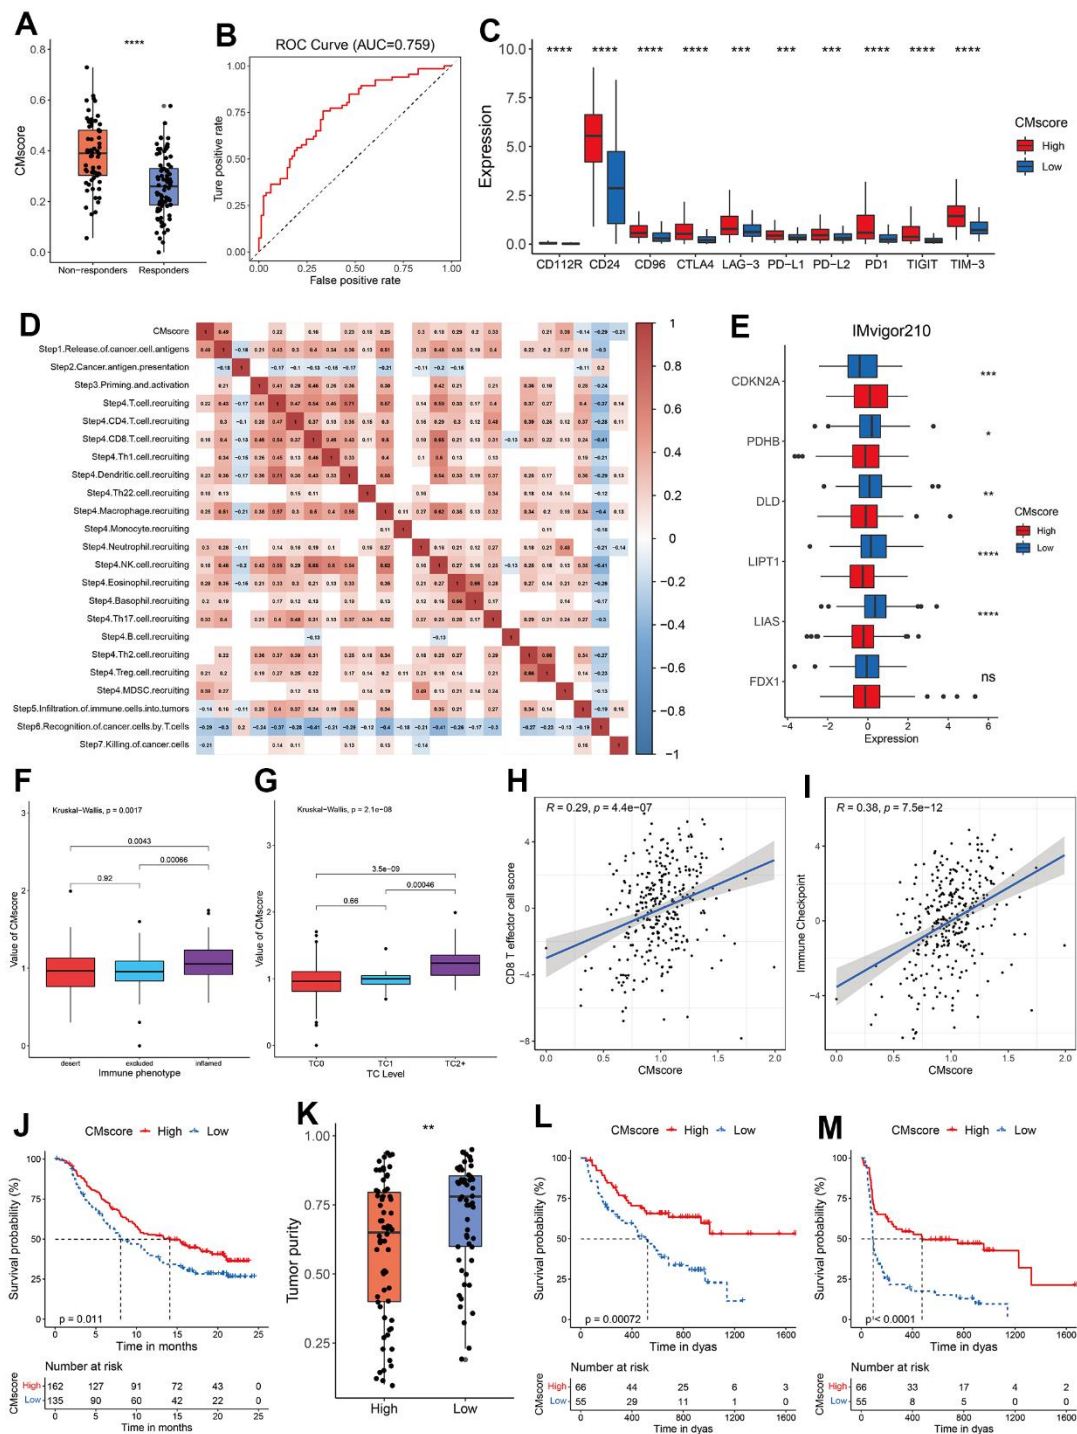

**Figure 6. Guidance of CMscore in the therapy for HCC patients.** (A) The box and dot plot showing the value of CMscore between responders and non-responders to TACE. Wilcoxon test was used for data analyses. (B) The AUC value of CMscore in predicting non-responsiveness of HCC patients to TACE. (C) The boxplot showing the expression of ICI-related genes in high- and low-CMscore subgroups of the TCGA\_LIHC dataset. (D) Correlation between CMscore and immune activity scores of each step of the Cancer-Immunity Cycle. (E) The boxplot showing the expression of cuproptosis-related genes in high- and low-CMscore subgroups of the IMvigor210 cohort. (F) The boxplot showing the level of CMscore in three immune phenotypes of mUC patients in the IMvigor210 cohort. (G) The boxplot showing the level of CMscore in mUC patients with different TC level in the IMvigor210 cohort. (H) Correlation between CMscore and CD8 T effector cell score in the IMvigor210 cohort. (I) Correlation between CMscore and level of immune checkpoint in the IMvigor210 cohort. (J) OS analyses of metastatic melanoma patients with high and low CMscore in the IMvigor210 cohort. (K) Box and dot plot showing the tumor purity of metastatic melanoma patients with high and low CMscore. (L, M) OS (L) and PFS (M) analyses of metastatic melanoma patients with high and low CMscore. P-values were shown as \* $p < 0.05$ , \*\* $p < 0.01$ , \*\*\* $p < 0.001$ , and \*\*\*\* $p < 0.0001$ .

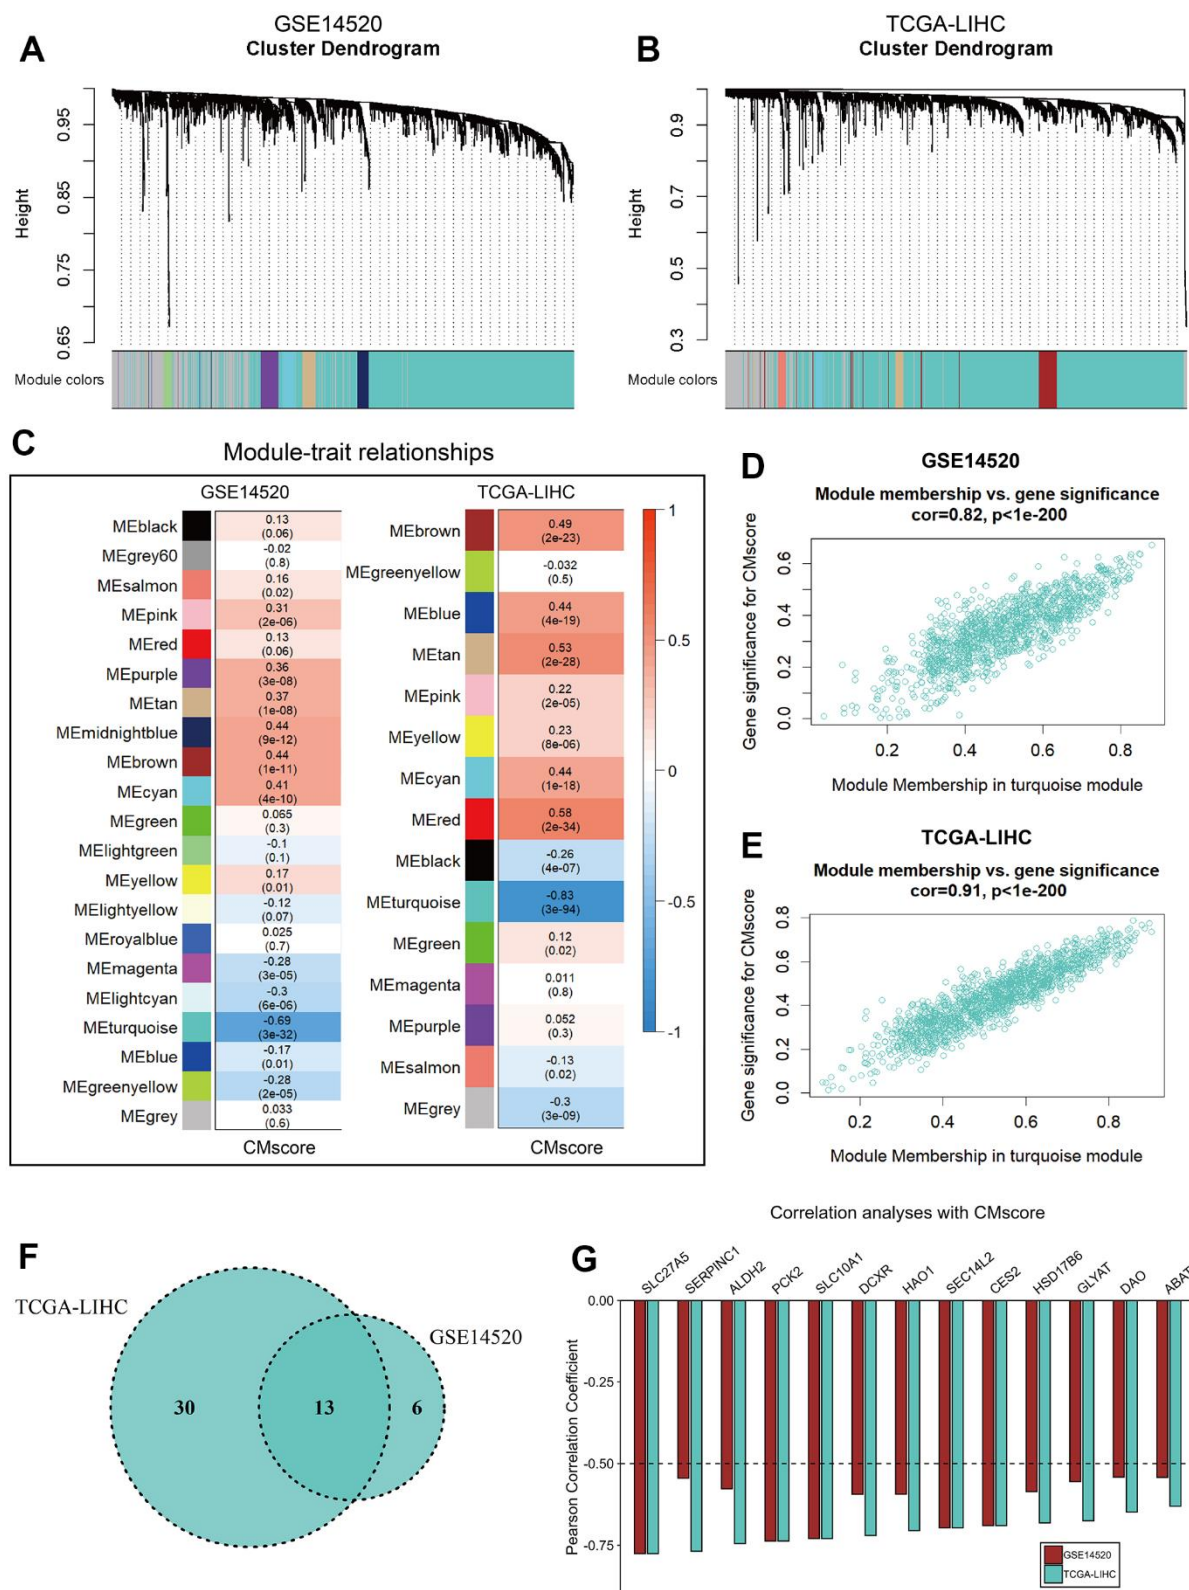

**Figure 7. WGCNA analyses of CMscore.** (A, B) Merging of mRNA co-expression modules in GSE14520 (A) and TCGA-LIHC (B) datasets. (C) Correlation heatmap of module genes and CMscore in the GSE14520 and TCGA-LIHC datasets. The correlation coefficient changed from – 1 to 1 as the color turned from blue to red gradually. (D, E) Scatterplot of the correlation coefficient between the selected module (turquoise module) and the CMscore in GSE14520 (D) and TCGA-LIHC (E) datasets. (F) Venn plot of hub genes of the selected module in GSE14520 and TCGA-LIHC datasets. (G) Correlation coefficient of selected hub genes with CMscore in GSE14520 and TCGA-LIHC datasets.

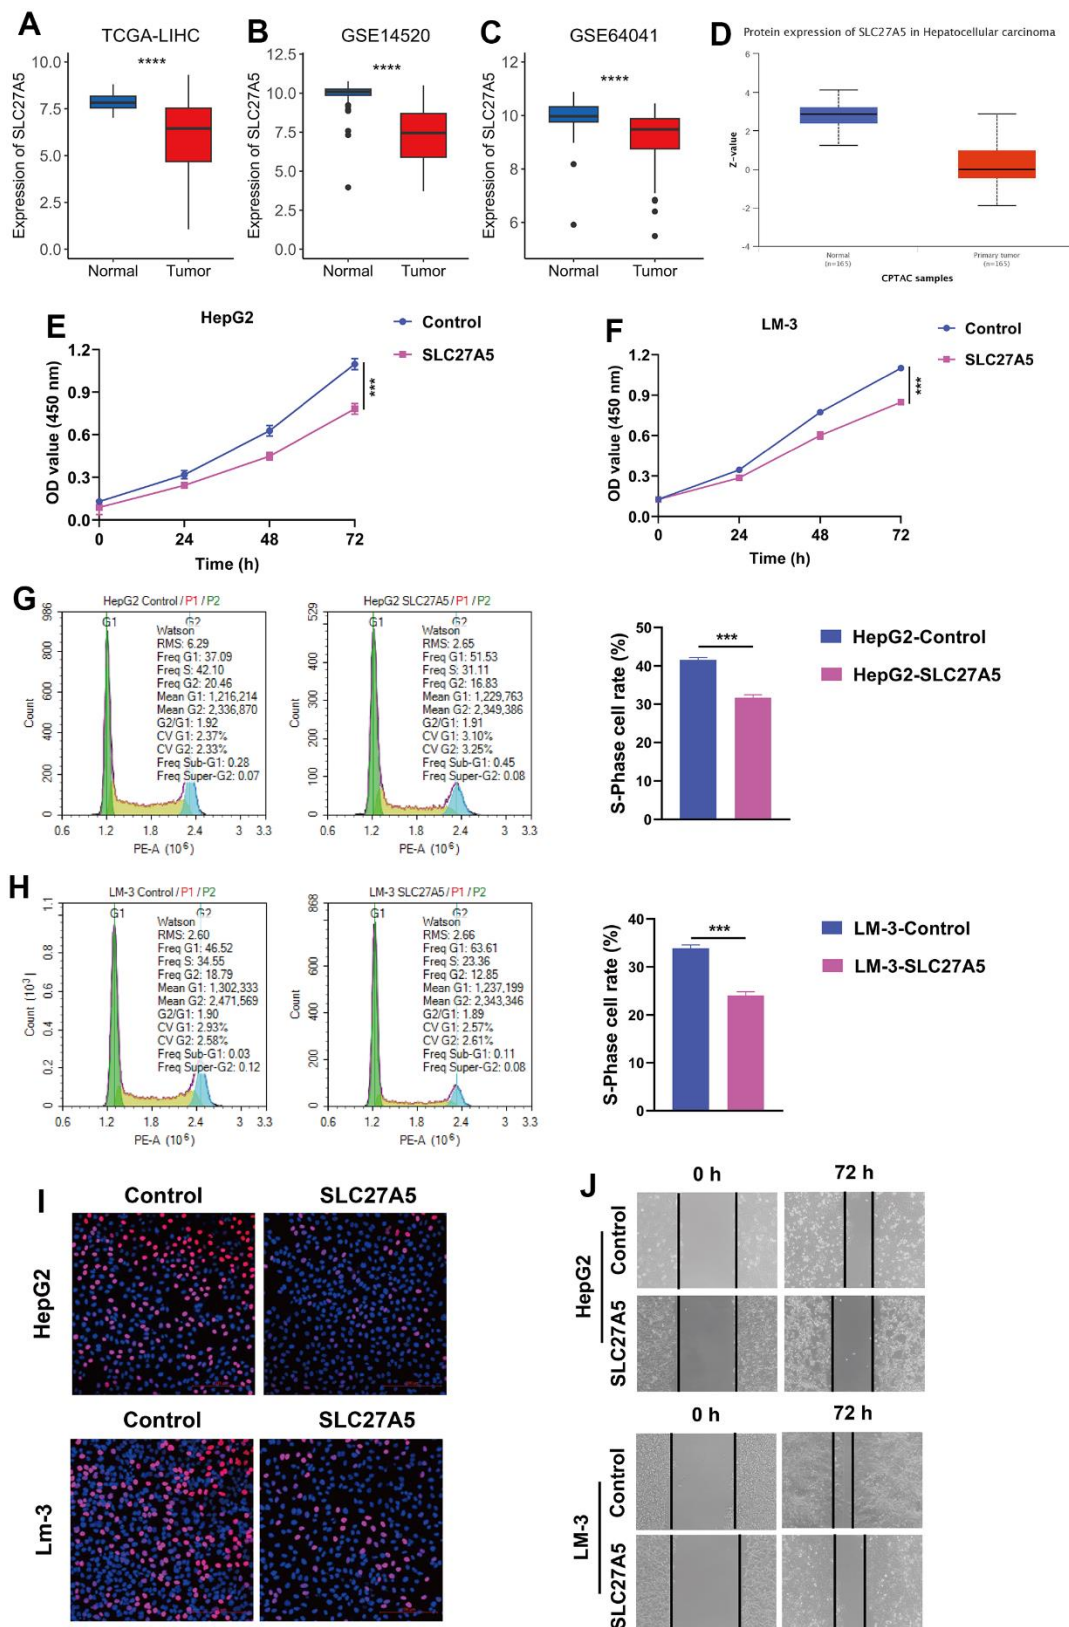

**Figure 8. The expression and function of SLC27A5 in HCC.** (A–C) The transcriptional expression of SLC27A5 in HCC and normal tissues of TCGA-LIHC (A), GSE14520 (B) and GSE64041 (C) datasets. (D) The protein level of SLC27A5 in HCC and normal tissues. (E, F) CCK-8 assay for HepG2 (E) and LM-3 (F) cells overexpressing SLC27A5. (G, H) HepG2 (G) and LM-3 (H) cells were subject to flow cytometry analysis for cell cycle. (I) HCC cells overexpressing SLC27A5 were subject to EdU staining. (J) HCC cells overexpressing SLC27A5 were subject to wound healing assay.

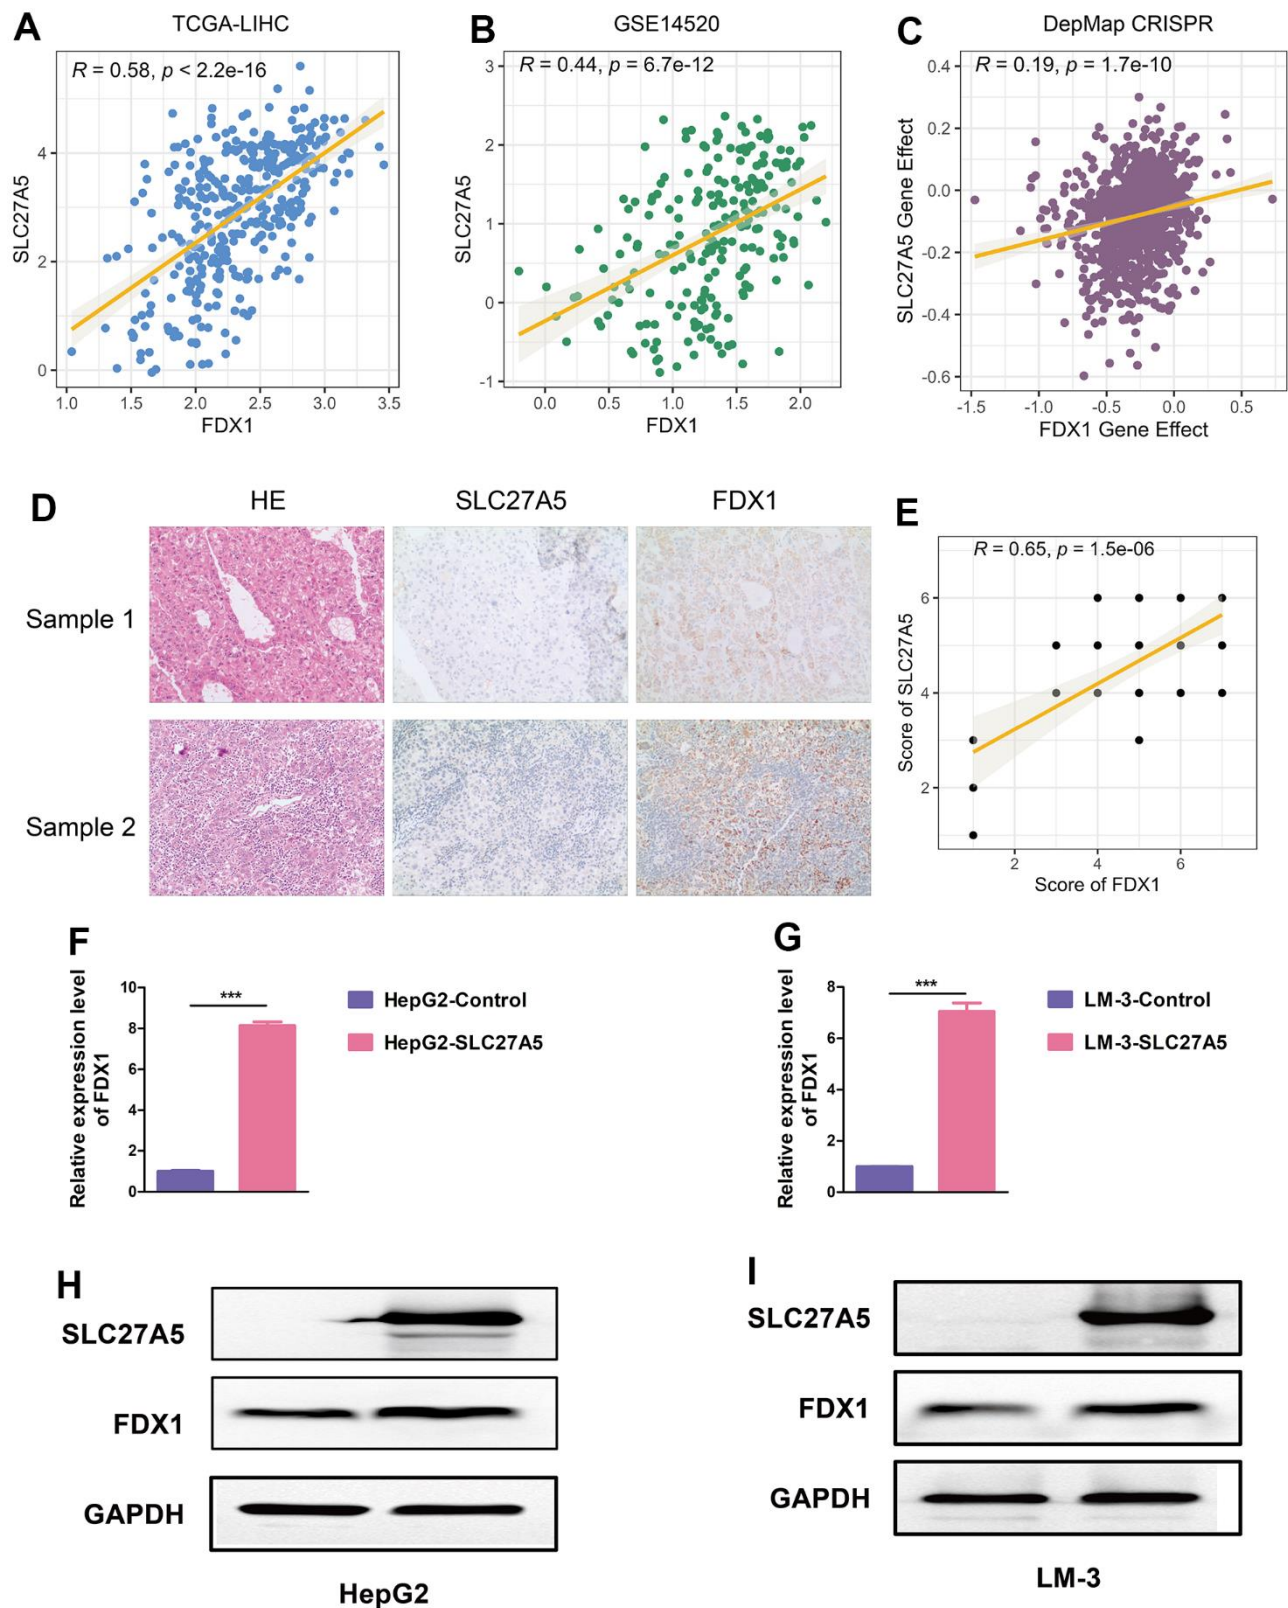

**Figure 9. SLC27A5 upregulates FDX1 in HCC.** (A, B) The correlation between the expression of SLC27A5 and that of FDX1 in TCGA-LIHC (A) and GSE14520 (B) datasets. (C) Dot plot showing the dependency scores for SLC27A5 and FDX1 across all tumor cell lines in the Project Achilles/Cancer Dependency Map Portal (DepMap). (D, E) The expression of and correlation between SLC27A5 and FDX1 in collected HCC tissue chip. (F, G) HepG2 (F) and LM-3 (G) cells overexpressing SLC27A5 were subject to qRT-PCR analysis. (H, I) Western blotting using lysates of HepG2 (H) and LM-3 (I) cells after overexpressing SLC27A5.

expression was dramatically decreased in tumors when compared with normal livers (Figure 2E), and their low expression was associated with significantly shorter OS (Supplementary Figure 1C–1E). On the contrary, the latter three genes might act as oncogenes because their expression and relationship with prognosis was opposite to that of the first three genes (Figure 2E and Supplementary Figure 1F–1H). TMPRSS6 is mainly expressed in the liver and critical in maintaining iron homeostasis [58], and it also contributes to abnormal circulating copper concentration (Supplementary Table 1). Sébastien P Dion et al. also noticed a much lower expression of TMPRSS6 in HCC cells when compared to human liver samples [59]. SORD predominantly exists in liver and catalyzes the NAD<sup>+</sup>-dependent conversion of sorbitol to fructose [60]. Serum level of SORD reflects liver damage. In patients with HCC, serum levels of SORD are elevated, and serum SORD levels greater than 15 ng/mL were associated with poor prognosis [61]. However, the exact role of TMPRSS6 and SORD in HCC requires further investigation. CCS is responsible for insertion of copper into Cu, Zn superoxide dismutase (SOD1), which acts as an antioxidant by eliminating toxic superoxide anion radicals [62]. Mice deficient in the SOD1 have increased oxidative stress and developed spontaneous HCC with age [63, 64], suggesting an at least indirect role of CCS in hindering the carcinogenesis of HCC. P2RX4 is an ion channel activated by extracellular ATP [65], and could also function as a pro-inflammatory receptor in cancer progression [66, 67]. Arun Asif et al. revealed that P2RX4 was significantly overexpressed in HCC [66]. And P2RX4 supports tumor growth and metastasis in other types of cancer like prostate cancer [68, 69]. ATP13A2 is a polyamine transporter which maintains healthy and functional lysosomes [70]. Although the role of ATP13A2 in HCC is currently unclear, Qian Chen et al. showed that downregulation of the gene reduced tumorigenesis of colon cancer by blocking autophagic flux [71]. LOX is a secreted copper-dependent amine oxidase, and increased level of LOX has been noted in HCC tissue, and is associated with poor prognosis of HCC patients [72, 73]. Indeed, knocking down the expression of LOX in HCC cells resulted in impaired migratory capability [73]. Taken together, HCC patients with high CMscore had high expression of P2RX4, ATP13A2 and LOX, and low expression of TMPRSS6, SORD, and CCS (Figure 2D), and might represent a more aggressive HCC subtype. Indeed, prognosis analyses revealed that HCC patients in the high-CMscore subgroup had significantly shorter OS and PFS (Figure 2H, 2J and Supplementary Figure 2A, 2C, 2D). Besides, CMscore could serve as an independent prognostic factor and had strong predictability for OS (Figures 2I, 2K, 3B, 3D). The 1-, 3-, and 5-year AUC value of CMscore revealed that CMscore exhibited a

good capability in predicting prognosis of HCC patients (Figure 2I, 2K). Further, we compared the C-index of CMscore and that of some previously published signatures (Supplementary Table 6) [74–79]. Although the C-index of some signatures [75, 77] was significantly higher than that of CMscore in the TCGA-LIHC dataset, this superiority was not repeated in another dataset (GSE14520) (Supplementary Table 6). In addition, the C-index of CMscore was the highest among that of the 7 signatures in the GSE14520 dataset. Taken together, the predictability of CMscore was not inferior to other signatures. Besides, CMscore showed a significantly positive correlation with most cancer-related pathways like cell cycle process, WNT signaling and ERBB signaling (Figure 4D–4F). Indeed, ‘sustain proliferative signaling’ has been identified to be one hallmark of cancer [80]. Mitogenic signals, including ERBB signaling and WNT signaling, have been well explored in HCC in supporting its proliferative capability and the growth of tumor [81, 82]. In addition, WNT and ERBB signalings also contribute to treatment resistance and poor prognosis of HCC patients [82, 83].

Since copper participates in many biological activities, it must exert certain impact on the TME of HCC. Florida Voli et al. revealed that increased intratumor copper levels augmented the expression of PD-L1 at transcriptional and translational levels in cancer cells and facilitated cancer immune evasion. Correspondingly, copper-chelators significantly increased the level of tumor-infiltrating CD8<sup>+</sup> T and natural killer cells [84]. However, how will copper metabolism affects TME and response to ICIs awaits more evidence. We found that CMscore had a strong positive relationship with the infiltration of most immune cells (Figure 5A–5K). In particular, HCC patients with high CMscore had significantly higher expression of pro-tumor immune infiltrates (Figure 5E) and immune checkpoint targets (Figure 6C). CMscore also showed a positive correlation with recruit of various types of immune cells, but a negative correlation with recognition of cancer cells by T cells and killing of cancer cells (Figure 6D). Taken together, HCC patients with high CMscore might exhibit an immune suppressive status. ICIs have become the keystone in the treatment for unresectable hepatocellular carcinoma [53, 85]. In two large cohorts in which cancer patients receiving ICIs, we noticed that these patients with high CMscore also exhibited high infiltration of immune cells and prolonged survival time after immunotherapy (Figure 6F–6M), suggesting cancer patients in the high CMscore subgroup might benefit from ICIs.

Further, WGCNA and subsequent correlation analyses further identified SLC27A5 exhibited a strong correlation with both CMscore (Figure 7). SLC27A5 was considerably downregulated in HCC when compared with

normal tissues (Figure 8A–8D), which was consistent with previously published works [86, 87]. Xu et al. found that SLC27A5 downregulated glutathione reductase, which further led to decreased level of glutathione (GSH) [88]. Studies revealed that the depletion GSH increased sensitivity of cells to cuproptosis [23, 89], suggesting a tight relationship between SLC27A5 and cuproptosis. Since FDX1 functions as a pivotal regulator of cuproptosis [23], we investigated the relationship between SLC27A5 and FDX1 in this work. Correlation analyses in TCGA-LIHC and GSE14520 datasets, collected tissue chip, and Depmap CRISPR dataset both suggested a significant positive correlation between the expression of SLC27A5 and that of FDX1 (Figure 9A–9E). Further, upregulation of SLC27A5 indeed increase the transcriptional and protein level of FDX1 (Figure 9H, 9I). Taken together, SLC27A5 could be a potential target of HCC, partially through the induction of cuproptosis via GSH and FDX1.

At last, several limitations of this work should be pointed out. Firstly, the study predominantly relies on publicly available HCC datasets, which may have inherent limitations such as sample heterogeneity, thus, the value of CMscore in predicting prognosis of HCC patients should be validated in collected tumor samples. Secondly, high throughout RNA-seq techniques have inherent bias in evaluating the precise transcriptional level of genes. Consequently, the CMscore, based on real time polymerase chain reaction (RT-PCR) techniques, could be tested on fresh tumor samples by further studies, since this method might be more economical and convenient in clinical practice. Thirdly, the validity of CMscore in predicting response to immunotherapy should be validated by well-designed prospective clinical studies.

## CONCLUSIONS

In conclusion, HCC patients exhibited dysregulated copper metabolism. CMscore, a novel risk score based on copper metabolism-related genes, was developed using the LASSO Cox regression model. HCC patients with high CMscore were enriched in most cancer-related pathways like MAPK signaling pathway and worse prognosis. In addition, these patients also exhibited an immune suppressive status and might benefit from immunotherapy. SLC27A5, a hub gene of CMscore, might be a potential regulator of cuproptosis in HCC.

## AUTHOR CONTRIBUTIONS

The study was designed by Guoyin Li and Xin Li. Data processing was carried out by Xiaoyan Li, Jinping Wang, Zongliang Guo, Yong Ma, Peng Dai, Yifan Chen, Qiongwen Liu, Jinke Jiao, Jinhan Fan, and

Ningxue Wu. Bioinformatics analysis was conducted by Xiaoyan Li, Zongliang Guo, Yong Ma, Guoyin Li. Dawei Xu and Daguang Fan provided useful advice to the analyses of the data. The manuscript was drafted by Guoyin Li and Xin Li, and was revised by all authors before the final version was approved to be published.

## CONFLICTS OF INTEREST

The authors declare that they have no conflicts of interest.

## ETHICAL STATEMENT AND CONSENT

Use of clinical specimens were approved by the Ethics Committee of Shanxi Provincial People's Hospital (2021-196), and the written consent obtained from the patients.

## FUNDING

This work was supported by the National Natural Science Foundation of China (81903031), China Postdoctoral Science Foundation (2020M682334), Fund of Key Laboratory of Modern Teaching Technology, Ministry of Education, P.R. China (NO. SYSK202107), General Project of Shanxi Natural Science Foundation, China (202203021211058), General Youth Project of Shanxi Natural Science Foundation, China (201901D211523).

## REFERENCES

1. Bisaglia M, Bubacco L. Copper Ions and Parkinson's Disease: Why Is Homeostasis So Relevant? *Biomolecules*. 2020; 10:195. <https://doi.org/10.3390/biom10020195> PMID: [32013126](https://pubmed.ncbi.nlm.nih.gov/32013126/)
2. Gromadzka G, Tarnacka B, Flaga A, Adamczyk A. Copper Dyshomeostasis in Neurodegenerative Diseases- Therapeutic Implications. *Int J Mol Sci*. 2020; 21:9259. <https://doi.org/10.3390/ijms21239259> PMID: [33291628](https://pubmed.ncbi.nlm.nih.gov/33291628/)
3. Kardos J, Héja L, Simon Á, Jablonkai I, Kovács R, Jemnitz K. Copper signalling: causes and consequences. *Cell Commun Signal*. 2018; 16:71. <https://doi.org/10.1186/s12964-018-0277-3> PMID: [30348177](https://pubmed.ncbi.nlm.nih.gov/30348177/)
4. Banci L, Bertini I, Cantini F, Rosenzweig AC, Yatsunyk LA. Metal binding domains 3 and 4 of the Wilson disease protein: solution structure and interaction with the copper(I) chaperone HAH1. *Biochemistry*. 2008; 47:7423–9. <https://doi.org/10.1021/bi8004736> PMID: [18558714](https://pubmed.ncbi.nlm.nih.gov/18558714/)
5. Forbes JR, Hsi G, Cox DW. Role of the copper-binding domain in the copper transport function of ATP7B, the

- P-type ATPase defective in Wilson disease. *J Biol Chem*. 1999; 274:12408–13.  
<https://doi.org/10.1074/jbc.274.18.12408>  
 PMID:10212214
6. Bagheri S, Squitti R, Haertlé T, Siotto M, Saboury AA. Role of Copper in the Onset of Alzheimer's Disease Compared to Other Metals. *Front Aging Neurosci*. 2018; 9:446.  
<https://doi.org/10.3389/fnagi.2017.00446>  
 PMID:29472855
  7. Spillantini MG, Schmidt ML, Lee VM, Trojanowski JQ, Jakes R, Goedert M. Alpha-synuclein in Lewy bodies. *Nature*. 1997; 388:839–40.  
<https://doi.org/10.1038/42166> PMID:9278044
  8. Sung YH, Rospigliosi C, Eliezer D. NMR mapping of copper binding sites in alpha-synuclein. *Biochim Biophys Acta*. 2006; 1764:5–12.  
<https://doi.org/10.1016/j.bbapap.2005.11.003>  
 PMID:16338184
  9. Li Y. Copper homeostasis: Emerging target for cancer treatment. *IUBMB Life*. 2020; 72:1900–8.  
<https://doi.org/10.1002/iub.2341> PMID:32599675
  10. Kaiafa GD, Saouli Z, Diamantidis MD, Kontoninas Z, Voulgaridou V, Raptaki M, Arampatzi S, Chatzidimitriou M, Perifanis V. Copper levels in patients with hematological malignancies. *Eur J Intern Med*. 2012; 23:738–41.  
<https://doi.org/10.1016/j.ejim.2012.07.009>  
 PMID:22920946
  11. Tisato F, Marzano C, Porchia M, Pellei M, Santini C. Copper in diseases and treatments, and copper-based anticancer strategies. *Med Res Rev*. 2010; 30:708–49.  
<https://doi.org/10.1002/med.20174>  
 PMID:19626597
  12. Grubman A, White AR. Copper as a key regulator of cell signalling pathways. *Expert Rev Mol Med*. 2014; 16:e11.  
<https://doi.org/10.1017/erm.2014.11> PMID:24849048
  13. Pavithra V, Sathisha TG, Kasturi K, Mallika DS, Amos SJ, Ragunatha S. Serum levels of metal ions in female patients with breast cancer. *J Clin Diagn Res*. 2015; 9:BC25–c27.  
<https://doi.org/10.7860/JCDR/2015/11627.5476>  
 PMID:25737978
  14. Zhang X, Yang Q. Association between serum copper levels and lung cancer risk: A meta-analysis. *J Int Med Res*. 2018; 46:4863–73.  
<https://doi.org/10.1177/0300060518798507>  
 PMID:30296873
  15. Mao S, Huang S. Zinc and copper levels in bladder cancer: a systematic review and meta-analysis. *Biol Trace Elem Res*. 2013; 153:5–10.  
<https://doi.org/10.1007/s12011-013-9682-z>  
 PMID:23640281
  16. Ressenrova A, Raudenska M, Holubova M, Svobodova M, Polanska H, Babula P, Masarik M, Gumulec J. Zinc and Copper Homeostasis in Head and Neck Cancer: Review and Meta-Analysis. *Curr Med Chem*. 2016; 23:1304–30.  
<https://doi.org/10.2174/0929867323666160405111543> PMID:27048341
  17. Jiang Y, Huo Z, Qi X, Zuo T, Wu Z. Copper-induced tumor cell death mechanisms and antitumor theragnostic applications of copper complexes. *Nanomedicine (Lond)*. 2022; 17:303–24.  
<https://doi.org/10.2217/nnm-2021-0374>  
 PMID:35060391
  18. Duan F, Li J, Huang J, Hua X, Song C, Wang L, Bi X, Xia W, Yuan Z. Establishment and Validation of Prognostic Nomograms Based on Serum Copper Level for Patients With Early-Stage Triple-Negative Breast Cancer. *Front Cell Dev Biol*. 2021; 9:770115.  
<https://doi.org/10.3389/fcell.2021.770115>  
 PMID:34901016
  19. Fang AP, Chen PY, Wang XY, Liu ZY, Zhang DM, Luo Y, Liao GC, Long JA, Zhong RH, Zhou ZG, Xu YJ, Xu XJ, Ling WH, et al. Serum copper and zinc levels at diagnosis and hepatocellular carcinoma survival in the Guangdong Liver Cancer Cohort. *Int J Cancer*. 2019; 144:2823–32.  
<https://doi.org/10.1002/ijc.31991>  
 PMID:30426509
  20. Brewer GJ, Dick RD, Grover DK, LeClaire V, Tseng M, Wicha M, Pienta K, Redman BG, Jahan T, Sondak VK, Strawderman M, LeCarpentier G, Merajver SD. Treatment of metastatic cancer with tetrathiomolybdate, an anticopper, antiangiogenic agent: Phase I study. *Clin Cancer Res*. 2000; 6:1–10.  
 PMID:10656425
  21. Cui L, Gouw AM, LaGory EL, Guo S, Attarwala N, Tang Y, Qi J, Chen YS, Gao Z, Casey KM, Bazhin AA, Chen M, Hu L, et al. Mitochondrial copper depletion suppresses triple-negative breast cancer in mice. *Nat Biotechnol*. 2021; 39:357–67.  
<https://doi.org/10.1038/s41587-020-0707-9>  
 PMID:33077961
  22. Oliveri V. Selective Targeting of Cancer Cells by Copper Ionophores: An Overview. *Front Mol Biosci*. 2022; 9:841814.  
<https://doi.org/10.3389/fmolb.2022.841814>  
 PMID:35309510
  23. Tsvetkov P, Coy S, Petrova B, Dreishpoon M, Verma A, Abdusamad M, Rossen J, Joesch-Cohen L, Humeidi R, Spangler RD, Eaton JK, Frenkel E, Kocak M, et al.

- Copper induces cell death by targeting lipoylated TCA cycle proteins. *Science*. 2022; 375:1254–61.  
<https://doi.org/10.1126/science.abf0529>  
PMID:35298263
24. Chen J, Jiang Y, Shi H, Peng Y, Fan X, Li C. The molecular mechanisms of copper metabolism and its roles in human diseases. *Pflugers Arch*. 2020; 472:1415–29.  
<https://doi.org/10.1007/s00424-020-02412-2>  
PMID:32506322
  25. Zhang YJ, Zhao DH, Huang CX. [The changes in copper contents and its clinical significance in patients with liver cirrhosis and hepatocarcinoma]. *Zhonghua Nei Ke Za Zhi*. 1994; 33:113–6. Chinese.  
PMID:8070291
  26. Tamai Y, Iwasa M, Eguchi A, Shigefuku R, Sugimoto K, Hasegawa H, Takei Y. Serum copper, zinc and metallothionein serve as potential biomarkers for hepatocellular carcinoma. *PLoS One*. 2020; 15:e0237370.  
<https://doi.org/10.1371/journal.pone.0237370>  
PMID:32857769
  27. Davis CI, Gu X, Kiefer RM, Ralle M, Gade TP, Brady DC. Altered copper homeostasis underlies sensitivity of hepatocellular carcinoma to copper chelation. *Metallomics*. 2020; 12:1995–2008.  
<https://doi.org/10.1039/d0mt00156b>  
PMID:33146201
  28. Wachsmann J, Peng F. Molecular imaging and therapy targeting copper metabolism in hepatocellular carcinoma. *World J Gastroenterol*. 2016; 22:221–31.  
<https://doi.org/10.3748/wjg.v22.i1.221>  
PMID:26755872
  29. Zhao H, Zhang J, Fu X, Mao D, Qi X, Liang S, Meng G, Song Z, Yang R, Guo Z, Tong B, Sun M, Zuo B, Li G. Integrated bioinformatics analysis of the NEDD4 family reveals a prognostic value of NEDD4L in clear-cell renal cell cancer. *PeerJ*. 2021; 9:e11880.  
<https://doi.org/10.7717/peerj.11880> PMID:34458018
  30. Zhang J, Zhang X, Li J, Song Z. Systematic analysis of the ABC transporter family in hepatocellular carcinoma reveals the importance of ABCB6 in regulating ferroptosis. *Life Sci*. 2020; 257:118131.  
<https://doi.org/10.1016/j.lfs.2020.118131>  
PMID:32710948
  31. Liu D, Schilling B, Liu D, Sucker A, Livingstone E, Jerby-Arnon L, Zimmer L, Gutzmer R, Satzger I, Loquai C, Grabbe S, Vokes N, Margolis CA, et al. Integrative molecular and clinical modeling of clinical outcomes to PD1 blockade in patients with metastatic melanoma. *Nat Med*. 2019; 25:1916–27.  
<https://doi.org/10.1038/s41591-019-0654-5>  
PMID:31792460
  32. Zheng S, Zou Y, Liang JY, Xiao W, Yang A, Meng T, Lu S, Luo Z, Xie X. Identification and validation of a combined hypoxia and immune index for triple-negative breast cancer. *Mol Oncol*. 2020; 14:2814–33.  
<https://doi.org/10.1002/1878-0261.12747>  
PMID:32521117
  33. Zhu Z, Li G, Li Z, Wu Y, Yang Y, Wang M, Zhang H, Qu H, Song Z, He Y. Core immune cell infiltration signatures identify molecular subtypes and promote precise checkpoint immunotherapy in cutaneous melanoma. *Front Immunol*. 2022; 13:914612.  
<https://doi.org/10.3389/fimmu.2022.914612>  
PMID:36072600
  34. Bindea G, Mlecnik B, Hackl H, Charoentong P, Tosolini M, Kirilovsky A, Fridman WH, Pagès F, Trajanoski Z, Galon J. ClueGO: a Cytoscape plug-in to decipher functionally grouped gene ontology and pathway annotation networks. *Bioinformatics*. 2009; 25:1091–3.  
<https://doi.org/10.1093/bioinformatics/btp101>  
PMID:19237447
  35. Shen XT, Xie SZ, Xu J, Yang LY, Qin LX. Pan-Cancer Analysis Reveals a Distinct Neutrophil Extracellular Trap-Associated Regulatory Pattern. *Front Immunol*. 2022; 13:798022.  
<https://doi.org/10.3389/fimmu.2022.798022>  
PMID:35432310
  36. Li G, Zhang H, Zhao J, Liu Q, Jiao J, Yang M, Wu C. Machine learning-based construction of immunogenic cell death-related score for improving prognosis and response to immunotherapy in melanoma. *Aging (Albany NY)*. 2023; 15:2667–88.  
<https://doi.org/10.18632/aging.204636>  
PMID:37036471
  37. Deng Y, Song Z, Huang L, Guo Z, Tong B, Sun M, Zhao J, Zhang H, Zhang Z, Li G. Tumor purity as a prognosis and immunotherapy relevant feature in cervical cancer. *Aging (Albany NY)*. 2021; 13:24768–85.  
<https://doi.org/10.18632/aging.203714>  
PMID:34844217
  38. Li T, Fu J, Zeng Z, Cohen D, Li J, Chen Q, Li B, Liu XS. TIMER2.0 for analysis of tumor-infiltrating immune cells. *Nucleic Acids Res*. 2020; 48:W509–14.  
<https://doi.org/10.1093/nar/gkaa407>  
PMID:32442275
  39. Langfelder P, Horvath S. WGCNA: an R package for weighted correlation network analysis. *BMC Bioinformatics*. 2008; 9:559.  
<https://doi.org/10.1186/1471-2105-9-559>  
PMID:19114008
  40. Tang J, Kong D, Cui Q, Wang K, Zhang D, Gong Y, Wu G. Prognostic Genes of Breast Cancer Identified by Gene

- Co-expression Network Analysis. *Front Oncol.* 2018; 8:374.  
<https://doi.org/10.3389/fonc.2018.00374>  
PMID:30254986
41. Zhang D, Han LL, Du F, Liu XM, Li J, Wang HH, Song MH, Li Z, Li GY. FGFR1 Induces Acquired Resistance Against Gefitinib By Activating AKT/mTOR Pathway In NSCLC. *Onco Targets Ther.* 2019; 12:9809–16.  
<https://doi.org/10.2147/OTT.S220462> PMID:31819480
  42. Li G, Song Z, Wu C, Li X, Zhao L, Tong B, Guo Z, Sun M, Zhao J, Zhang H, Jia L, Li S, Wang L. Downregulation of NEDD4L by EGFR signaling promotes the development of lung adenocarcinoma. *J Transl Med.* 2022; 20:47.  
<https://doi.org/10.1186/s12967-022-03247-4>  
PMID:35090513
  43. Huang JZ, Chen M, Chen D, Gao XC, Zhu S, Huang H, Hu M, Zhu H, Yan GR. A Peptide Encoded by a Putative lncRNA HOXB-AS3 Suppresses Colon Cancer Growth. *Mol Cell.* 2017; 68:171–84.e6.  
<https://doi.org/10.1016/j.molcel.2017.09.015>  
PMID:28985503
  44. Tan J, Liu W, Li J, Zhang X, Liu Y, Yuan Y, Song Z. Over-expressed RHEB promotes the progression of pancreatic adenocarcinoma. *Life Sci.* 2021; 277:119462.  
<https://doi.org/10.1016/j.lfs.2021.119462>  
PMID:33831427
  45. Liu Y, Zhang X, Zhang J, Tan J, Li J, Song Z. Development and Validation of a Combined Ferroptosis and Immune Prognostic Classifier for Hepatocellular Carcinoma. *Front Cell Dev Biol.* 2020; 8:596679.  
<https://doi.org/10.3389/fcell.2020.596679>  
PMID:33425905
  46. Koizumi M, Fujii J, Suzuki K, Inoue T, Inoue T, Gutteridge JM, Taniguchi N. A marked increase in free copper levels in the plasma and liver of LEC rats: an animal model for Wilson disease and liver cancer. *Free Radic Res.* 1998; 28:441–50.  
<https://doi.org/10.3109/10715769809066881>  
PMID:9702524
  47. Poźnański J, Sołdacki D, Czarkowska-Pączek B, Bonna A, Kornasiewicz O, Krawczyk M, Bal W, Pączek L. Cirrhotic Liver of Liver Transplant Recipients Accumulate Silver and Co-Accumulate Copper. *Int J Mol Sci.* 2021; 22:1782.  
<https://doi.org/10.3390/ijms22041782>  
PMID:33670100
  48. Ge EJ, Bush AI, Casini A, Cobine PA, Cross JR, DeNicola GM, Dou QP, Franz KJ, Gohil VM, Gupta S, Kaler SG, Lutsenko S, Mittal V, et al. Connecting copper and cancer: from transition metal signalling to metalloplasia. *Nat Rev Cancer.* 2022; 22:102–13.  
<https://doi.org/10.1038/s41568-021-00417-2>  
PMID:34764459
  49. Bagaev A, Kotlov N, Nomie K, Svekolkin V, Gafurov A, Isaeva O, Osokin N, Kozlov I, Frenkel F, Gancharova O, Almog N, Tsiper M, Ataulkhanov R, Fowler N. Conserved pan-cancer microenvironment subtypes predict response to immunotherapy. *Cancer Cell.* 2021; 39:845–65.e7.  
<https://doi.org/10.1016/j.ccell.2021.04.014>  
PMID:34019806
  50. Li T, Fan J, Wang B, Traugh N, Chen Q, Liu JS, Li B, Liu XS. TIMER: A Web Server for Comprehensive Analysis of Tumor-Infiltrating Immune Cells. *Cancer Res.* 2017; 77:e108–10.  
<https://doi.org/10.1158/0008-5472.CAN-17-0307>  
PMID:29092952
  51. Chang Y, Jeong SW, Young Jang J, Jae Kim Y. Recent Updates of Transarterial Chemoembolization in Hepatocellular Carcinoma. *Int J Mol Sci.* 2020; 21:8165.  
<https://doi.org/10.3390/ijms21218165>  
PMID:33142892
  52. Llovet JM, Castet F, Heikenwalder M, Maini MK, Mazzaferro V, Pinato DJ, Pikarsky E, Zhu AX, Finn RS. Immunotherapies for hepatocellular carcinoma. *Nat Rev Clin Oncol.* 2022; 19:151–72.  
<https://doi.org/10.1038/s41571-021-00573-2>  
PMID:34764464
  53. Ren Z, Xu J, Bai Y, Xu A, Cang S, Du C, Li Q, Lu Y, Chen Y, Guo Y, Chen Z, Liu B, Jia W, et al, and ORIENT-32 study group. Sintilimab plus a bevacizumab biosimilar (IBI305) versus sorafenib in unresectable hepatocellular carcinoma (ORIENT-32): a randomised, open-label, phase 2-3 study. *Lancet Oncol.* 2021; 22:977–90.  
[https://doi.org/10.1016/S1470-2045\(21\)00252-7](https://doi.org/10.1016/S1470-2045(21)00252-7)  
PMID:34143971
  54. Xu L, Deng C, Pang B, Zhang X, Liu W, Liao G, Yuan H, Cheng P, Li F, Long Z, Yan M, Zhao T, Xiao Y, Li X. TIP: A Web Server for Resolving Tumor Immunophenotype Profiling. *Cancer Res.* 2018; 78:6575–80.  
<https://doi.org/10.1158/0008-5472.CAN-18-0689>  
PMID:30154154
  55. Mariathasan S, Turley SJ, Nickles D, Castiglioni A, Yuen K, Wang Y, Kadel EE II, Koeppen H, Astarita JL, Cubas R, Jhunjhunwala S, Banchereau R, Yang Y, et al. TGFβ attenuates tumour response to PD-L1 blockade by contributing to exclusion of T cells. *Nature.* 2018; 554:544–8.  
<https://doi.org/10.1038/nature25501> PMID:29443960
  56. Meyers RM, Bryan JG, McFarland JM, Weir BA, Sizemore AE, Xu H, Dharia NV, Montgomery PG, Cowley GS, Pantel S, Goodale A, Lee Y, Ali LD, et al.

- Computational correction of copy number effect improves specificity of CRISPR-Cas9 essentiality screens in cancer cells. *Nat Genet.* 2017; 49:1779–84.  
<https://doi.org/10.1038/ng.3984>  
PMID:29083409
57. Ma M, Qiu B, Jin J, Wang J, Nie Y, Liang Y, Yu Z, Teng CB. Establishment of a specific *in vivo* Cu (I) reporting system based on metallothionein screening. *Metallomics.* 2021; 13:mfab035.  
<https://doi.org/10.1093/mtomcs/mfab035>  
PMID:34114637
  58. Du X, She E, Gelbart T, Truksa J, Lee P, Xia Y, Khovananth K, Mudd S, Mann N, Moresco EM, Beutler E, Beutler B. The serine protease TMPRSS6 is required to sense iron deficiency. *Science.* 2008; 320:1088–92.  
<https://doi.org/10.1126/science.1157121>  
PMID:18451267
  59. Dion SP, Béliveau F, Morency LP, Désilets A, Najmanovich R, Leduc R. Functional diversity of TMPRSS6 isoforms and variants expressed in hepatocellular carcinoma cell lines. *Sci Rep.* 2018; 8:12562.  
<https://doi.org/10.1038/s41598-018-30618-z>  
PMID:30135444
  60. El-Kabbani O, Darmanin C, Chung RP. Sorbitol dehydrogenase: structure, function and ligand design. *Curr Med Chem.* 2004; 11:465–76.  
<https://doi.org/10.2174/0929867043455927>  
PMID:14965227
  61. Jeon D, Choi WM, Kim JS, Jung Y, Lee SY, Seo HR, Kim KM. Serum Sorbitol Dehydrogenase as a Novel Prognostic Factor for Hepatocellular Carcinoma after Surgical Resection. *Cancers (Basel).* 2021; 13:6143.  
<https://doi.org/10.3390/cancers13236143>  
PMID:34885252
  62. Bertinato J, L'Abbé MR. Copper modulates the degradation of copper chaperone for Cu,Zn superoxide dismutase by the 26 S proteasome. *J Biol Chem.* 2003; 278:35071–8.  
<https://doi.org/10.1074/jbc.M302242200>  
PMID:12832419
  63. Elchuri S, Oberley TD, Qi W, Eisenstein RS, Jackson Roberts L, Van Remmen H, Epstein CJ, Huang TT. CuZnSOD deficiency leads to persistent and widespread oxidative damage and hepatocarcinogenesis later in life. *Oncogene.* 2005; 24:367–80.  
<https://doi.org/10.1038/sj.onc.1208207>  
PMID:15531919
  64. Mohammed S, Nicklas EH, Thadathil N, Selvarani R, Royce GH, Kinter M, Richardson A, Deepa SS. Role of necroptosis in chronic hepatic inflammation and fibrosis in a mouse model of increased oxidative stress. *Free Radic Biol Med.* 2021; 164:315–28.  
<https://doi.org/10.1016/j.freeradbiomed.2020.12.449>  
PMID:33429022
  65. Coddou C, Villalobos C, González J, Acuña-Castillo C, Loeb B, Huidobro-Toro JP. Formation of carnosine-Cu(II) complexes prevents and reverts the inhibitory action of copper in P2X4 and P2X7 receptors. *J Neurochem.* 2002; 80:626–33.  
<https://doi.org/10.1046/j.0022-3042.2001.00732.x>  
PMID:11841570
  66. Asif A, Khalid M, Manzoor S, Ahmad H, Rehman AU. Role of purinergic receptors in hepatobiliary carcinoma in Pakistani population: an approach towards proinflammatory role of P2X4 and P2X7 receptors. *Purinergic Signal.* 2019; 15:367–74.  
<https://doi.org/10.1007/s11302-019-09675-0>  
PMID:31401785
  67. Draganov D, Gopalakrishna-Pillai S, Chen YR, Zuckerman N, Moeller S, Wang C, Ann D, Lee PP. Modulation of P2X4/P2X7/Pannexin-1 sensitivity to extracellular ATP via Ivermectin induces a non-apoptotic and inflammatory form of cancer cell death. *Sci Rep.* 2015; 5:16222.  
<https://doi.org/10.1038/srep16222>  
PMID:26552848
  68. He J, Zhou Y, Arredondo Carrera HM, Sprules A, Neagu R, Zarkesh SA, Eaton C, Luo J, Gartland A, Wang N. Inhibiting the P2X4 Receptor Suppresses Prostate Cancer Growth *In Vitro* and *In Vivo*, Suggesting a Potential Clinical Target. *Cells.* 2020; 9:2511.  
<https://doi.org/10.3390/cells9112511>  
PMID:33233569
  69. Huo JF, Chen XB. P2X4R silence suppresses glioma cell growth through BDNF/TrkB/ATF4 signaling pathway. *J Cell Biochem.* 2019; 120:6322–9.  
<https://doi.org/10.1002/jcb.27919> PMID:30362154
  70. van Veen S, Martin S, Van den Haute C, Benoy V, Lyons J, Vanhoutte R, Kahler JP, Decuyper JP, Gelders G, Lambie E, Zielich J, Swinnen JV, Annaert W, et al. ATP13A2 deficiency disrupts lysosomal polyamine export. *Nature.* 2020; 578:419–24.  
<https://doi.org/10.1038/s41586-020-1968-7>  
PMID:31996848
  71. Chen Q, Zhong L, Zhou C, Feng Y, Liu QX, Zhou D, Lu X, Du GS, Jian D, Luo H, Wang D, Zheng H, Qiu Y. Knockdown of Parkinson's disease-related gene ATP13A2 reduces tumorigenesis via blocking autophagic flux in colon cancer. *Cell Biosci.* 2020; 10:144.  
<https://doi.org/10.1186/s13578-020-00506-z>  
PMID:33308286

72. Lin HY, Li CJ, Yang YL, Huang YH, Hsiao YT, Chu PY. Roles of Lysyl Oxidase Family Members in the Tumor Microenvironment and Progression of Liver Cancer. *Int J Mol Sci.* 2020; 21:9751.  
<https://doi.org/10.3390/ijms21249751>  
PMID:[33371259](https://pubmed.ncbi.nlm.nih.gov/33371259/)
73. Umezaki N, Nakagawa S, Yamashita YI, Kitano Y, Arima K, Miyata T, Hiyoshi Y, Okabe H, Nitta H, Hayashi H, Imai K, Chikamoto A, Baba H. Lysyl oxidase induces epithelial-mesenchymal transition and predicts intrahepatic metastasis of hepatocellular carcinoma. *Cancer Sci.* 2019; 110:2033–43.  
<https://doi.org/10.1111/cas.14010>  
PMID:[30919528](https://pubmed.ncbi.nlm.nih.gov/30919528/)
74. Li G, Xu W, Zhang L, Liu T, Jin G, Song J, Wu J, Wang Y, Chen W, Zhang C, Chen X, Ding Z, Zhu P, Zhang B. Development and validation of a CIMP-associated prognostic model for hepatocellular carcinoma. *EBioMedicine.* 2019; 47:128–41.  
<https://doi.org/10.1016/j.ebiom.2019.08.064>  
PMID:[31492561](https://pubmed.ncbi.nlm.nih.gov/31492561/)
75. Ouyang G, Yi B, Pan G, Chen X. A robust twelve-gene signature for prognosis prediction of hepatocellular carcinoma. *Cancer Cell Int.* 2020; 20:207.  
<https://doi.org/10.1186/s12935-020-01294-9>  
PMID:[32514252](https://pubmed.ncbi.nlm.nih.gov/32514252/)
76. Liang JY, Wang DS, Lin HC, Chen XX, Yang H, Zheng Y, Li YH. A Novel Ferroptosis-related Gene Signature for Overall Survival Prediction in Patients with Hepatocellular Carcinoma. *Int J Biol Sci.* 2020; 16:2430–41.  
<https://doi.org/10.7150/ijbs.45050> PMID:[32760210](https://pubmed.ncbi.nlm.nih.gov/32760210/)
77. Zhou T, Cai Z, Ma N, Xie W, Gao C, Huang M, Bai Y, Ni Y, Tang Y. A Novel Ten-Gene Signature Predicting Prognosis in Hepatocellular Carcinoma. *Front Cell Dev Biol.* 2020; 8:629.  
<https://doi.org/10.3389/fcell.2020.00629>  
PMID:[32760725](https://pubmed.ncbi.nlm.nih.gov/32760725/)
78. Mo Z, Zhang S, Zhang S. A Novel Signature Based on mTORC1 Pathway in Hepatocellular Carcinoma. *J Oncol.* 2020; 2020:8291036.  
<https://doi.org/10.1155/2020/8291036>  
PMID:[33014055](https://pubmed.ncbi.nlm.nih.gov/33014055/)
79. Wang Z, Zhang N, Lv J, Ma C, Gu J, Du Y, Qiu Y, Zhang Z, Li M, Jiang Y, Zhao J, Du H, Zhang Z, et al. A Five-Gene Signature for Recurrence Prediction of Hepatocellular Carcinoma Patients. *Biomed Res Int.* 2020; 2020:4037639.  
<https://doi.org/10.1155/2020/4037639>  
PMID:[33163533](https://pubmed.ncbi.nlm.nih.gov/33163533/)
80. Hanahan D. Hallmarks of Cancer: New Dimensions. *Cancer Discov.* 2022; 12:31–46.  
<https://doi.org/10.1158/2159-8290.CD-21-1059>  
PMID:[35022204](https://pubmed.ncbi.nlm.nih.gov/35022204/)
81. Li Y, Hu J, Guo D, Ma W, Zhang X, Zhang Z, Lu G, He S. LncRNA SNHG5 promotes the proliferation and cancer stem cell-like properties of HCC by regulating UPF1 and Wnt-signaling pathway. *Cancer Gene Ther.* 2022; 29:1373–83.  
<https://doi.org/10.1038/s41417-022-00456-3>  
PMID:[35338348](https://pubmed.ncbi.nlm.nih.gov/35338348/)
82. Zhong L, Liao D, Zhang M, Zeng C, Li X, Zhang R, Ma H, Kang T. YTHDF2 suppresses cell proliferation and growth via destabilizing the EGFR mRNA in hepatocellular carcinoma. *Cancer Lett.* 2019; 442:252–61.  
<https://doi.org/10.1016/j.canlet.2018.11.006>  
PMID:[30423408](https://pubmed.ncbi.nlm.nih.gov/30423408/)
83. Wang J, Yu H, Dong W, Zhang C, Hu M, Ma W, Jiang X, Li H, Yang P, Xiang D. N6-Methyladenosine-Mediated Up-Regulation of FZD10 Regulates Liver Cancer Stem Cells' Properties and Lenvatinib Resistance Through WNT/ $\beta$ -Catenin and Hippo Signaling Pathways. *Gastroenterology.* 2023; 164:990–1005.  
<https://doi.org/10.1053/j.gastro.2023.01.041>  
PMID:[36764493](https://pubmed.ncbi.nlm.nih.gov/36764493/)
84. Voli F, Valli E, Lerra L, Kimpton K, Saletta F, Giorgi FM, Mercatelli D, Rouaen JR, Shen S, Murray JE, Ahmed-Cox A, Cirillo G, Mayoh C, et al. Intratumoral Copper Modulates PD-L1 Expression and Influences Tumor Immune Evasion. *Cancer Res.* 2020; 80:4129–44.  
<https://doi.org/10.1158/0008-5472.CAN-20-0471>  
PMID:[32816860](https://pubmed.ncbi.nlm.nih.gov/32816860/)
85. Finn RS, Qin S, Ikeda M, Galle PR, Ducreux M, Kim TY, Kudo M, Breder V, Merle P, Kaseb AO, Li D, Verret W, Xu DZ, et al, and IMbrave150 Investigators. Atezolizumab plus Bevacizumab in Unresectable Hepatocellular Carcinoma. *N Engl J Med.* 2020; 382:1894–905.  
<https://doi.org/10.1056/NEJMoa1915745>  
PMID:[32402160](https://pubmed.ncbi.nlm.nih.gov/32402160/)
86. Gao Q, Zhang G, Zheng Y, Yang Y, Chen C, Xia J, Liang L, Lei C, Hu Y, Cai X, Zhang W, Tang H, Chen Y, et al. SLC27A5 deficiency activates NRF2/TXNRP1 pathway by increased lipid peroxidation in HCC. *Cell Death Differ.* 2020; 27:1086–104.  
<https://doi.org/10.1038/s41418-019-0399-1>  
PMID:[31367013](https://pubmed.ncbi.nlm.nih.gov/31367013/)
87. Wang J, Qiao Y, Sun H, Chang H, Zhao H, Zhang S, Shan C. Decreased SLC27A5 Suppresses Lipid Synthesis and Tyrosine Metabolism to Activate the Cell Cycle in Hepatocellular Carcinoma. *Biomedicine.* 2022; 10:234.  
<https://doi.org/10.3390/biomedicine10020234>  
PMID:[35203444](https://pubmed.ncbi.nlm.nih.gov/35203444/)

88. Xu FL, Wu XH, Chen C, Wang K, Huang LY, Xia J, Liu Y, Shan XF, Tang N. SLC27A5 promotes sorafenib-induced ferroptosis in hepatocellular carcinoma by downregulating glutathione reductase. *Cell Death Dis.* 2023; 14:22.  
<https://doi.org/10.1038/s41419-023-05558-w>  
PMID:[36635256](https://pubmed.ncbi.nlm.nih.gov/36635256/)
89. Xu Y, Liu SY, Zeng L, Ma H, Zhang Y, Yang H, Liu Y, Fang S, Zhao J, Xu Y, Ashby CR Jr, He Y, Dai Z, Pan Y. An

Enzyme-Engineered Nonporous Copper(I) Coordination Polymer Nanoplatfrom for Cuproptosis-Based Synergistic Cancer Therapy. *Adv Mater.* 2022; 34:e2204733.  
<https://doi.org/10.1002/adma.202204733>  
PMID:[36054475](https://pubmed.ncbi.nlm.nih.gov/36054475/)

# SUPPLEMENTARY MATERIALS

## Supplementary Figures

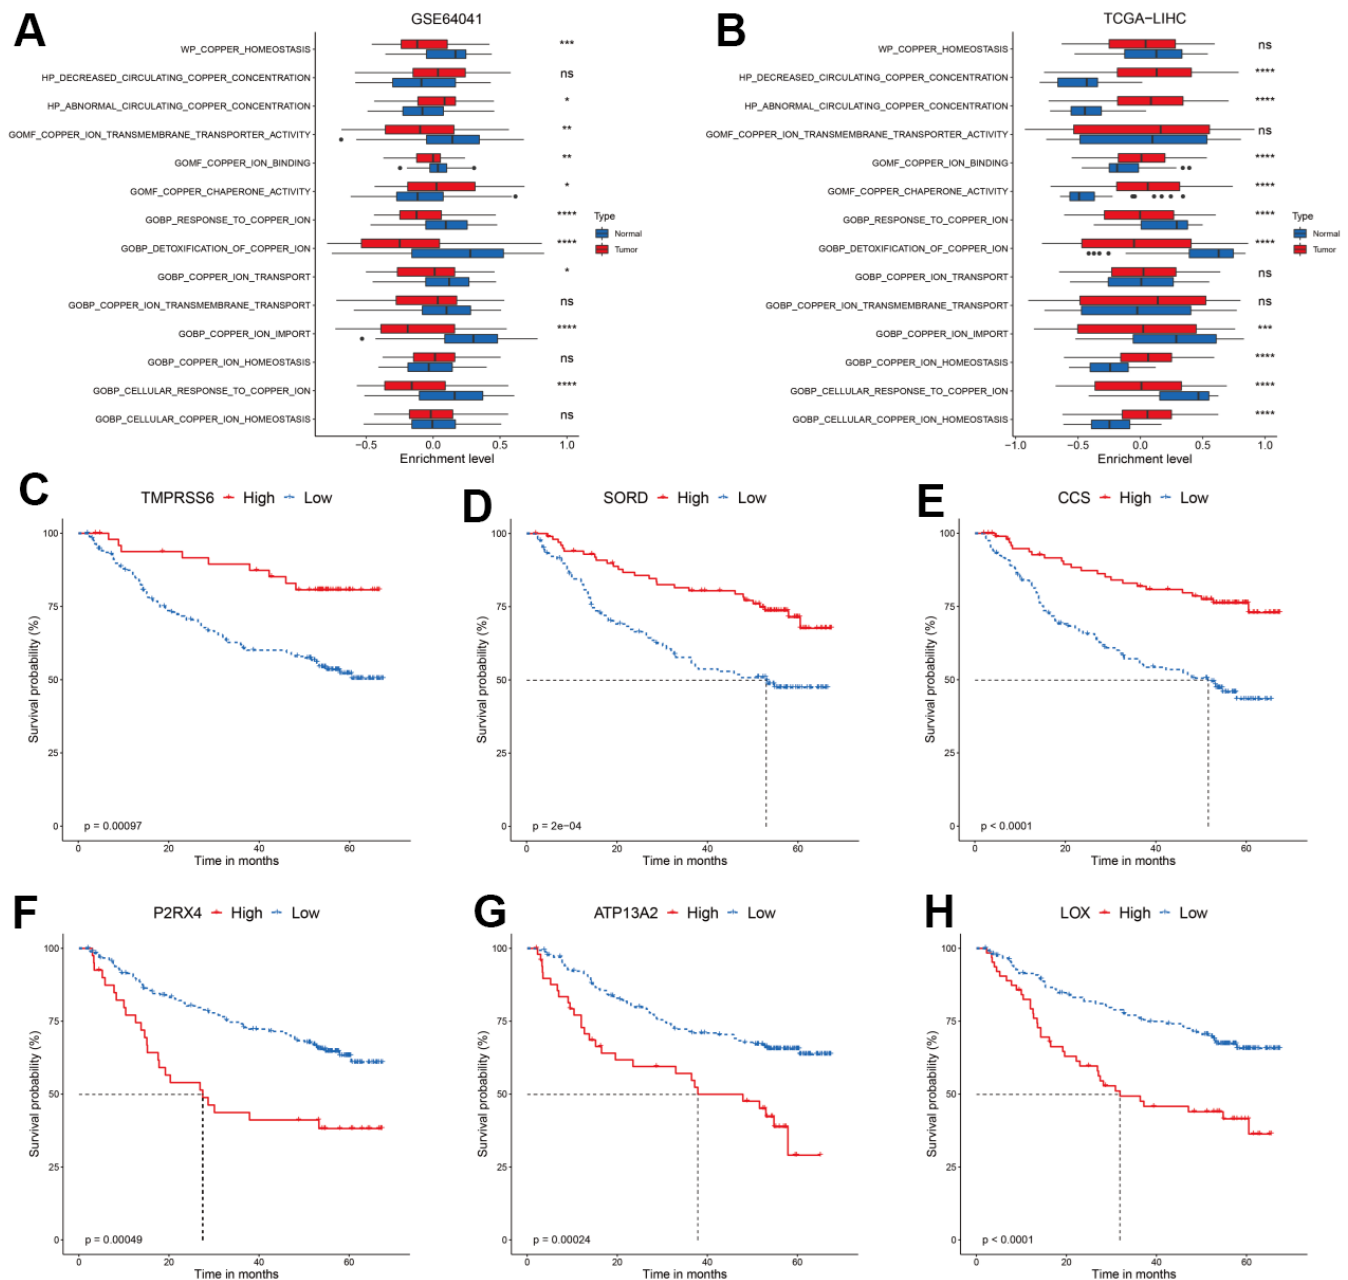

**Supplementary Figure 1. Copper metabolism was aberrantly expressed in HCC and might affect prognosis of HCC patients.** (A, B) The box plot showing the enrichment level of 14 copper metabolism in tumor and corresponding normal tissues from GSE64041 (A) and TCGA-LIHC (B) dataset. (C–H) Prognosis analyses of HCC patients stratified by the expression of TMPRSS6 (C), SORD (D), CCS (E), P2RX4 (F), ATP13A2 (G) and LOX (H). P-values were shown as \* $p < 0.05$ , \*\* $p < 0.01$ , \*\*\* $p < 0.001$ , and \*\*\*\* $p < 0.0001$ .

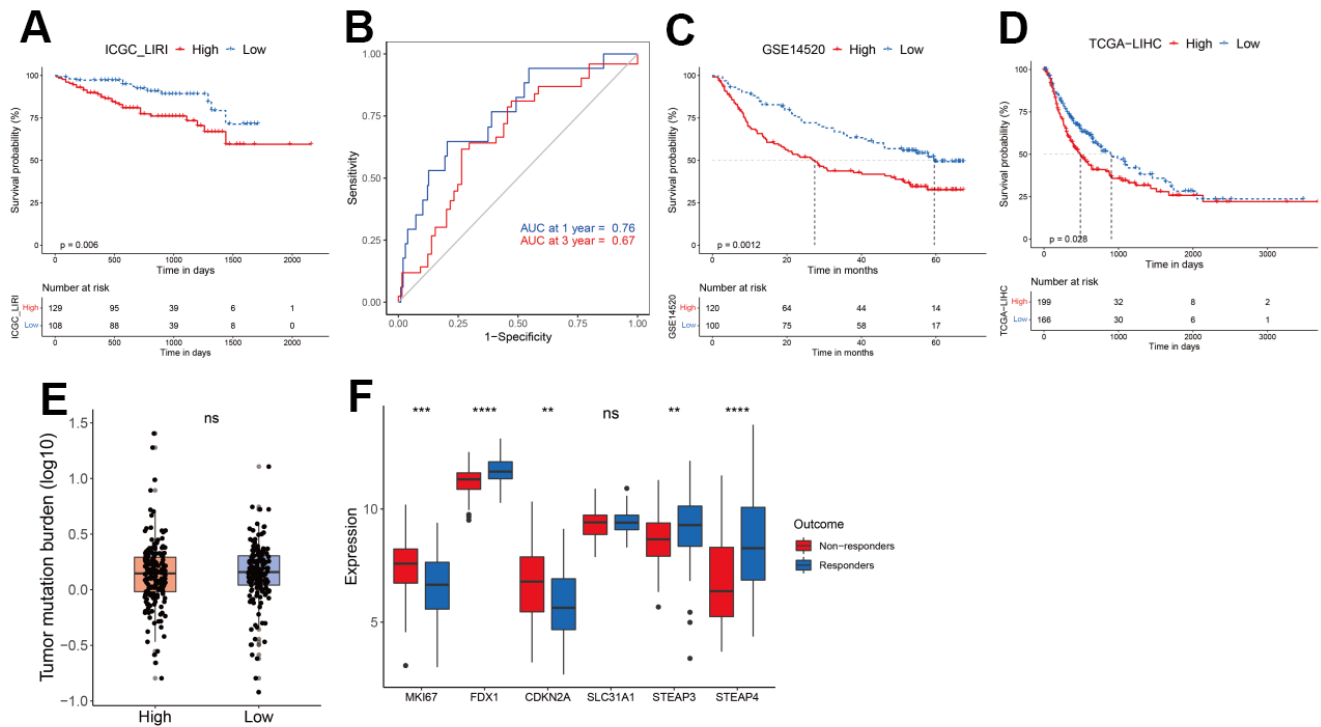

**Supplementary Figure 2. Prognosis and TMB analyses in CMscore stratified HCC subgroups.** (A) The prognostic significance of CMscore in the ICGC-LIRI dataset. The Kaplan-Meier method was used for prognosis analysis. (B) Time-dependent ROC analyses of the CMscore regarding the OS and survival status in the ICGC-LIRI dataset. (C, D) PFS analyses of HCC patients with high and low CMscore in the GSE14520 (C) and TCGA-LIHC (D) cohorts. (E) Box and dot plot showing the TMB of HCC patients from high- and low-CMscore subgroups. Wilcoxon test was used for data analyses. (F) The boxplot showing the expression of MKI67, cuproptosis-related genes, and copper ion import related genes between responders and non-responders to TACE.

## Supplementary Tables

Please browse Full Text version to see the data of Supplementary Tables 2, 3, 6.

**Supplementary Table 1. Clinicopathological information of HCC patients whose samples were used in the tissue chip.**

| Demographic data |        |    |    |    | Clinical data |               |               |                 |            |
|------------------|--------|----|----|----|---------------|---------------|---------------|-----------------|------------|
| Age              | Gender | T  | N  | M  | Stage         | HBV infection | HCV infection | liver cirrhosis | Child-pugh |
| 32               | Female | T4 | N0 | M0 | IIIB          | HBV infection | HCV infection | Yes             | A          |
| 32               | Male   | T2 | N0 | M0 | II            | Yes           | No            | Yes             | A          |
| 38               | Male   | T2 | N0 | M0 | II            | Yes           | No            | Yes             | A          |
| 43               | Female | T2 | N0 | M0 | II            | Yes           | No            | No              | A          |
| 45               | Male   | T2 | N0 | M0 | II            | Yes           | No            | Yes             | A          |
| 46               | Female | T2 | N0 | M0 | II            | Yes           | No            | Yes             | A          |
| 47               | Male   | T2 | N0 | M0 | II            | Yes           | No            | Yes             | A          |
| 47               | Female | T1 | N0 | M0 | I             | Yes           | No            | No              | A          |
| 48               | Male   | T2 | N0 | M0 | II            | Yes           | No            | Yes             | A          |
| 49               | Male   | T2 | N0 | M0 | II            | Yes           | No            | Yes             | A          |
| 49               | Male   | T3 | N0 | M0 | IIIA          | Yes           | No            | Yes             | A          |
| 50               | Male   | T4 | N0 | M0 | IIIB          | Yes           | No            | Yes             | A          |
| 52               | Male   | T3 | N0 | M0 | IIIA          | No            | Yes           | Yes             | B          |
| 53               | Female | T2 | N0 | M0 | II            | Yes           | No            | No              | A          |
| 53               | Female | T2 | N0 | M0 | II            | Yes           | No            | Yes             | A          |
| 54               | Male   | T1 | N0 | M0 | I             | Yes           | No            | No              | A          |
| 54               | Male   | T1 | N0 | M0 | I             | Yes           | No            | No              | A          |
| 54               | Female | T1 | N0 | M0 | I             | Yes           | No            | Yes             | A          |
| 54               | Male   | T3 | N0 | M0 | IIIA          | Yes           | No            | Yes             | A          |
| 54               | Male   | T3 | N0 | M0 | IIIA          | No            | No            | No              | A          |
| 55               | Female | T3 | N0 | M0 | IIIA          | Yes           | No            | No              | A          |
| 55               | Male   | T4 | N0 | M0 | IIIB          | Yes           | No            | Yes             | A          |
| 57               | Female | T1 | N0 | M0 | I             | No            | No            | Yes             | A          |
| 57               | Female | T3 | N0 | M0 | IIIA          | Yes           | No            | Yes             | A          |
| 59               | Female | T2 | N0 | M0 | II            | Yes           | No            | Yes             | A          |
| 59               | Female | T2 | N0 | M0 | II            | Yes           | No            | Yes             | A          |
| 59               | Female | T2 | N0 | M0 | II            | Yes           | No            | Yes             | A          |
| 59               | Female | T3 | N0 | M0 | IIIA          | No            | Yes           | No              | A          |
| 59               | Male   | T4 | N0 | M0 | IIIB          | Yes           | No            | Yes             | A          |
| 61               | Male   | T2 | N0 | M0 | II            | Yes           | No            | No              | A          |
| 62               | Female | T4 | N0 | M0 | IIIB          | Yes           | No            | No              | B          |
| 62               | Male   | T2 | N0 | M0 | II            | No            | No            | Yes             | A          |
| 62               | Male   | T4 | N0 | M0 | IIIB          | No            | No            | Yes             | A          |
| 63               | Female | T2 | N0 | M0 | II            | No            | No            | No              | A          |
| 63               | Female | T2 | N0 | M0 | II            | No            | No            | No              | A          |
| 64               | Male   | T1 | N0 | M0 | I             | No            | No            | Yes             | A          |
| 65               | Female | T2 | N0 | M0 | II            | Yes           | No            | Yes             | B          |
| 66               | Male   | T4 | N0 | M0 | IIIB          | No            | No            | No              | A          |
| 66               | Female | T4 | N0 | M0 | IIIB          | No            | No            | No              | A          |
| 68               | Female | T1 | N0 | M0 | I             | No            | No            | Yes             | A          |
| 69               | Male   | T1 | N0 | M0 | I             | No            | No            | Yes             | A          |

|    |        |    |    |    |      |     |     |     |   |
|----|--------|----|----|----|------|-----|-----|-----|---|
| 69 | Female | T1 | N0 | M0 | I    | Yes | No  | Yes | A |
| 69 | Female | T1 | N0 | M0 | I    | No  | Yes | Yes | A |
| 72 | Male   | T4 | N0 | M0 | IIIB | No  | No  | No  | A |
| 74 | Female | T1 | N0 | M0 | I    | No  | No  | Yes | A |
| 77 | Male   | T2 | N0 | M0 | II   | Yes | No  | Yes | A |

**Supplementary Table 2. The 14 copper metabolism-related pathways downloaded from the GSEA website.**

**Supplementary Table 3. The 134 copper metabolism-related genes used in this study.**

**Supplementary Table 4. GSEA analysis in HCC patients with high CMscore.**

| NAME                                                            | NES       | NOM p-val   | FDR q-val  |
|-----------------------------------------------------------------|-----------|-------------|------------|
| KEGG_FC_GAMMA_R_MEDIATED_PHAGOCYTOSIS                           | 1.8984437 | 0           | 0.17004614 |
| KEGG_ENDOCYTOSIS                                                | 1.819987  | 0.002061856 | 0.16127017 |
| KEGG_NOTCH_SIGNALING_PATHWAY                                    | 1.8202299 | 0.00210084  | 0.20135938 |
| KEGG_MAPK_SIGNALING_PATHWAY                                     | 1.6682875 | 0.0041841   | 0.1557375  |
| KEGG_GNRH_SIGNALING_PATHWAY                                     | 1.6934952 | 0.006085193 | 0.14486559 |
| KEGG_PANCREATIC_CANCER                                          | 1.7722937 | 0.008097166 | 0.21240525 |
| KEGG_NOD LIKE RECEPTOR SIGNALING PATHWAY                        | 1.8361194 | 0.008130081 | 0.2266231  |
| KEGG_PATHWAYS_IN_CANCER                                         | 1.7375147 | 0.010373444 | 0.15497063 |
| KEGG_PATHOGENIC_ESCHERICHIA_COLI_INFECTION                      | 1.7488441 | 0.011904762 | 0.17216738 |
| KEGG_PURINE_METABOLISM                                          | 1.6673263 | 0.012170386 | 0.14906801 |
| KEGG_GAP_JUNCTION                                               | 1.6483914 | 0.012396694 | 0.14366534 |
| KEGG_BLADDER_CANCER                                             | 1.7637283 | 0.013435701 | 0.19546312 |
| KEGG_SNARE_INTERACTIONS_IN_VESICULAR_TRANSPORT                  | 1.7114455 | 0.016064256 | 0.16438843 |
| KEGG_REGULATION_OF_ACTIN_CYTOSKELETON                           | 1.7046009 | 0.016460905 | 0.15059586 |
| KEGG_VIBRIO_CHOLERAEE_INFECTION                                 | 1.7124143 | 0.018292682 | 0.17648296 |
| KEGG_SMALL_CELL_LUNG_CANCER                                     | 1.6785665 | 0.018329939 | 0.15270367 |
| KEGG_MELANOGENESIS                                              | 1.6630584 | 0.018595042 | 0.13967341 |
| KEGG_AXON_GUIDANCE                                              | 1.6471983 | 0.02        | 0.12902525 |
| KEGG_GLYCOSAMINOGLYCAN_BIOSYNTHESIS_CHONDROITIN_SULFATE         | 1.6451277 | 0.024844721 | 0.12586027 |
| KEGG_BASAL_CELL_CARCINOMA                                       | 1.5684719 | 0.027027028 | 0.13928673 |
| KEGG_EPITHELIAL_CELL_SIGNALING_IN_HELICOBACTER_PYLORI_INFECTION | 1.6477886 | 0.027667984 | 0.13871863 |
| KEGG_P53_SIGNALING_PATHWAY                                      | 1.5558062 | 0.028089888 | 0.1365577  |
| KEGG_CHRONIC_MYELOID_LEUKEMIA                                   | 1.6473626 | 0.028806584 | 0.1338181  |
| KEGG_CELL_CYCLE                                                 | 1.7635086 | 0.030364372 | 0.1712885  |
| KEGG_T_CELL_RECEPTOR_SIGNALING_PATHWAY                          | 1.7456275 | 0.030549899 | 0.1598494  |
| KEGG_WNT_SIGNALING_PATHWAY                                      | 1.5573068 | 0.030737706 | 0.13850737 |
| KEGG_PHOSPHATIDYLINOSITOL_SIGNALING_SYSTEM                      | 1.6307317 | 0.032193158 | 0.12288766 |
| KEGG_TYPE_II_DIABETES_MELLITUS                                  | 1.5539867 | 0.032319393 | 0.13243896 |
| KEGG_LONG_TERM_DEPRESSION                                       | 1.5745752 | 0.032388665 | 0.14137192 |
| KEGG_MELANOMA                                                   | 1.5366602 | 0.032520324 | 0.13525765 |
| KEGG_LEISHMANIA_INFECTION                                       | 1.709076  | 0.03305785  | 0.15535463 |
| KEGG_GLYCEROPHOSPHOLIPID_METABOLISM                             | 1.4821936 | 0.033464566 | 0.14194037 |
| KEGG_DILATED_CARDIOMYOPATHY                                     | 1.6396748 | 0.036072146 | 0.12726225 |
| KEGG_CYTOSOLIC_DNA_SENSING_PATHWAY                              | 1.6315686 | 0.0375      | 0.12604359 |
| KEGG_B_CELL_RECEPTOR_SIGNALING_PATHWAY                          | 1.697551  | 0.037549406 | 0.14886461 |
| KEGG_CHEMOKINE_SIGNALING_PATHWAY                                | 1.663699  | 0.03757829  | 0.14522162 |
| KEGG_ETHER_LIPID_METABOLISM                                     | 1.5466341 | 0.03960396  | 0.13287674 |
| KEGG_ECM_RECEPTOR_INTERACTION                                   | 1.6233107 | 0.04208417  | 0.12099782 |

|                                             |           |             |             |
|---------------------------------------------|-----------|-------------|-------------|
| KEGG_SPHINGOLIPID_METABOLISM                | 1.5098191 | 0.042682927 | 0.14172791  |
| KEGG_FC_EPSILON_RI_SIGNALING_PATHWAY        | 1.6230218 | 0.043737575 | 0.117826074 |
| KEGG_HEDGEHOG_SIGNALING_PATHWAY             | 1.5247976 | 0.046184737 | 0.13716604  |
| KEGG_VEGF_SIGNALING_PATHWAY                 | 1.5736735 | 0.046875    | 0.1385639   |
| KEGG_CYTOKINE_CYTOKINE_RECEPTOR_INTERACTION | 1.6529329 | 0.047131147 | 0.14498721  |
| KEGG_HOMOLOGOUS_RECOMBINATION               | 1.567613  | 0.048117153 | 0.13666774  |
| KEGG_TOLL_LIKE_RECEPTOR_SIGNALING_PATHWAY   | 1.6257775 | 0.048484847 | 0.122614816 |
| KEGG_PRIMARY_IMMUNODEFICIENCY               | 1.634781  | 0.048484847 | 0.12693438  |

**Supplementary Table 5. GSEA analysis in HCC patients with low CMscore.**

| NAME                                              | NES        | NOM p-val   | FDR q-val   |
|---------------------------------------------------|------------|-------------|-------------|
| KEGG_RETINOL_METABOLISM                           | -2.167813  | 0           | 0.002035083 |
| KEGG_PEROXISOME                                   | -2.0712562 | 0           | 0.002079365 |
| KEGG_GLYCINE_SERINE_AND_THREONINE_METABOLISM      | -2.1039007 | 0           | 0.002399225 |
| KEGG_DRUG_METABOLISM_CYTOCHROME_P450              | -2.0773907 | 0           | 0.002495238 |
| KEGG_BETA_ALANINE_METABOLISM                      | -2.1281288 | 0           | 0.002568046 |
| KEGG_TRYPTOPHAN_METABOLISM                        | -2.0808556 | 0           | 0.002895563 |
| KEGG_FATTY_ACID_METABOLISM                        | -2.0415673 | 0           | 0.003641113 |
| KEGG_ARGININE_AND_PROLINE_METABOLISM              | -1.9889241 | 0           | 0.006149278 |
| KEGG_BUTANOATE_METABOLISM                         | -1.9770343 | 0           | 0.006535998 |
| KEGG_PROPANOATE_METABOLISM                        | -1.9579531 | 0           | 0.006807423 |
| KEGG_PPAR_SIGNALING_PATHWAY                       | -1.9671538 | 0           | 0.006864346 |
| KEGG_DRUG_METABOLISM_OTHER_ENZYMES                | -1.9174808 | 0           | 0.009751262 |
| KEGG_VALINE_LEUCINE_AND_ISOLEUCINE_DEGRADATION    | -1.9209632 | 0           | 0.010396404 |
| KEGG_LINOLEIC_ACID_METABOLISM                     | -1.8366377 | 0           | 0.016201999 |
| KEGG_PRIMARY_BILE_ACID_BIOSYNTHESIS               | -1.8980548 | 0.002070393 | 0.009768278 |
| KEGG_HISTIDINE_METABOLISM                         | -1.9145805 | 0.002109705 | 0.009277614 |
| KEGG_STEROID_HORMONE_BIOSYNTHESIS                 | -1.911821  | 0.002136752 | 0.008890382 |
| KEGG_TYROSINE_METABOLISM                          | -1.8882285 | 0.004175365 | 0.009211825 |
| KEGG_METABOLISM_OF_XENOBIOTICS_BY_CYTOCHROME_P450 | -1.893714  | 0.004273505 | 0.009375573 |
| KEGG_LYSINE_DEGRADATION                           | -1.818755  | 0.006122449 | 0.018197488 |
| KEGG_ASCORBATE_AND_ALDARATE_METABOLISM            | -1.8160095 | 0.010351967 | 0.018044308 |
| KEGG_CITRATE_CYCLE_TCA_CYCLE                      | -1.829712  | 0.012145749 | 0.017026087 |
| KEGG_ALANINE_ASPARTATE_AND_GLUTAMATE_METABOLISM   | -1.748662  | 0.012711864 | 0.03250989  |
| KEGG_PYRUVATE_METABOLISM                          | -1.7198697 | 0.014799154 | 0.038862422 |
| KEGG_PARKINSONS_DISEASE                           | -1.868609  | 0.029106028 | 0.011506476 |
| KEGG_NITROGEN_METABOLISM                          | -1.5743402 | 0.03411514  | 0.08322459  |
| KEGG_CYSTEINE_AND_METHIONINE_METABOLISM           | -1.5310292 | 0.036734693 | 0.098343    |
| KEGG_COMPLEMENT_AND_COAGULATION_CASCADES          | -1.7384919 | 0.03877551  | 0.034447856 |
| KEGG_STARCH_AND_SUCROSE_METABOLISM                | -1.5690577 | 0.039337475 | 0.08343582  |
| KEGG_GLYOXYLATE_AND_DICARBOXYLATE_METABOLISM      | -1.6042256 | 0.039915968 | 0.08150707  |
| KEGG_PENTOSE_AND_GLUCURONATE_INTERCONVERSIONS     | -1.6057246 | 0.041841004 | 0.083651654 |
| KEGG_PORPHYRIN_AND_CHLOROPHYLL_METABOLISM         | -1.5906465 | 0.045161292 | 0.08498338  |
| KEGG_BIOSYNTHESIS_OF_UNSATURATED_FATTY_ACIDS      | -1.5831201 | 0.045738045 | 0.08373493  |
| KEGG_ADIPOCYTOKINE_SIGNALING_PATHWAY              | -1.5256513 | 0.046747968 | 0.096184686 |
| KEGG_GLYCOLYSIS_GLUONEOGENESIS                    | -1.5889574 | 0.04821803  | 0.08305111  |
| KEGG_PHENYLALANINE_METABOLISM                     | -1.5288436 | 0.0491453   | 0.096786246 |

**Supplementary Table 6. The comparison between CMscore and previously published signatures in predicting prognosis of HCC patients.**
