# Supplementary material for: Copper metabolism-related risk score identifies hepatocellular carcinoma subtypes and SLC27A5 as a potential regulator of cuproptosis
Source: Aging (Albany NY). 2023 Dec 28;15(24):15084–113. doi: 10.18632/aging.205334 (PMC10781498; doi:10.18632/aging.205334)
Supplement: Supplementary Figures [file aging-15-205334-s001.pdf]

## SUPPLEMENTARY FIGURES

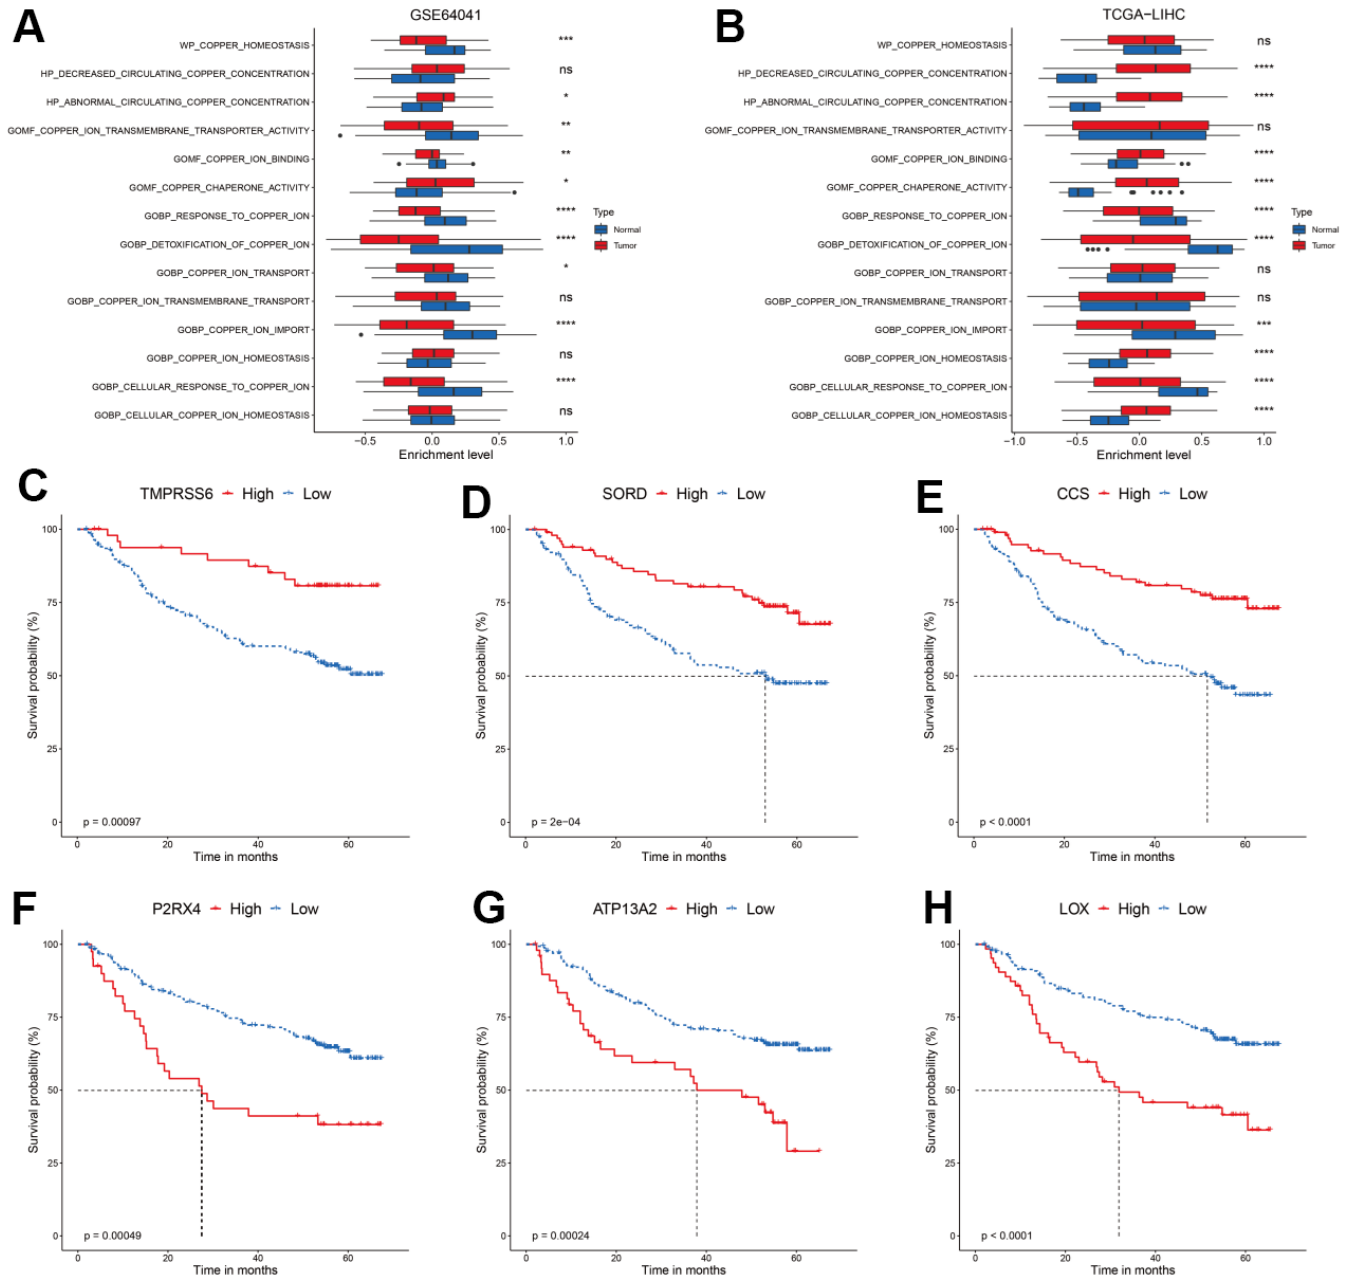

**Supplementary Figure 1. Copper metabolism was aberrantly expressed in HCC and might affect prognosis of HCC patients.**

(A, B) The box plot showing the enrichment level of 14 copper metabolism in tumor and corresponding normal tissues from GSE64041 (A) and TCGA-LIHC (B) dataset. (C–H) Prognosis analyses of HCC patients stratified by the expression of TMPRSS6 (C), SORD (D), CCS (E), P2RX4 (F), ATP13A2 (G) and LOX (H). P-values were shown as \*p < 0.05, \*\*p < 0.01, \*\*\*p < 0.001, and \*\*\*\*p < 0.0001.

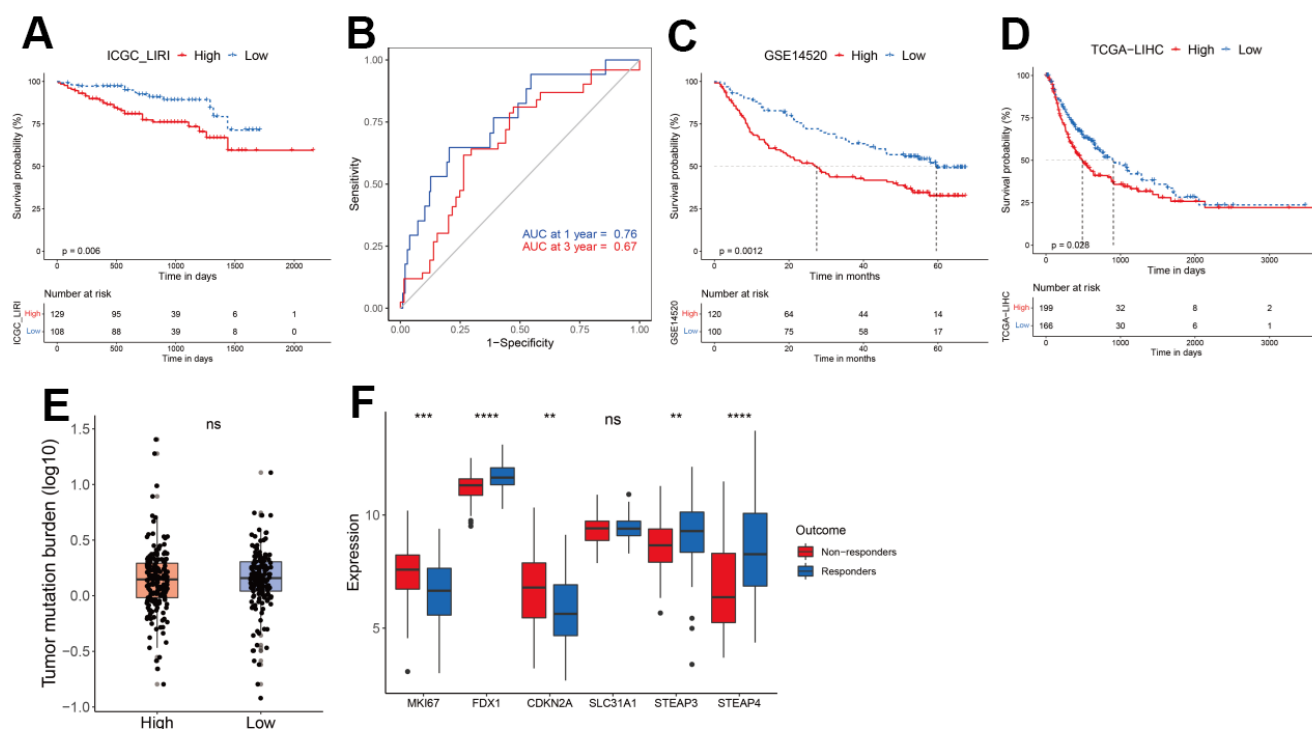

**Supplementary Figure 2. Prognosis and TMB analyses in CMscore stratified HCC subgroups.** (A) The prognostic significance of CMscore in the ICGC-LIRI dataset. The Kaplan-Meier method was used for prognosis analysis. (B) Time-dependent ROC analyses of the CMscore regarding the OS and survival status in the ICGC-LIRI dataset. (C, D) PFS analyses of HCC patients with high and low CMscore in the GSE14520 (C) and TCGA-LIHC (D) cohorts. (E) Box and dot plot showing the TMB of HCC patients from high- and low-CMscore subgroups. Wilcoxon test was used for data analyses. (F) The boxplot showing the expression of MKI67, cuproptosis-related genes, and copper ion import related genes between responders and non-responders to TACE.
