# Supplementary material for: Copper metabolism-related risk score identifies hepatocellular carcinoma subtypes and SLC27A5 as a potential regulator of cuproptosis
Source: publisher site journal article supplement (doi:10.18632/aging.205334), 2023-12-28
Supplement: Supplementary file [file aging-v15i24-205334-supplementary-material-SD5.pdf]

**Supplementary Table 4. GSEA analysis in HCC patients with high CMScore.**

| <b>NAME</b>                                                     | <b>NES</b> | <b>NOM p-val</b> | <b>FDR q-val</b> |
|-----------------------------------------------------------------|------------|------------------|------------------|
| KEGG_FC_GAMMA_R_MEDIATED_PHAGOCYTOSIS                           | 1.8984437  | 0                | 0.17004614       |
| KEGG_ENDOCYTOSIS                                                | 1.819987   | 0.002061856      | 0.16127017       |
| KEGG_NOTCH_SIGNALING_PATHWAY                                    | 1.8202299  | 0.00210084       | 0.20135938       |
| KEGG_MAPK_SIGNALING_PATHWAY                                     | 1.6682875  | 0.0041841        | 0.1557375        |
| KEGG_GNRH_SIGNALING_PATHWAY                                     | 1.6934952  | 0.006085193      | 0.14486559       |
| KEGG_PANCREATIC_CANCER                                          | 1.7722937  | 0.008097166      | 0.21240525       |
| KEGG_NOD_LIKE_RECEPTOR_SIGNALING_PATHWAY                        | 1.8361194  | 0.008130081      | 0.2266231        |
| KEGG_PATHWAYS_IN_CANCER                                         | 1.7375147  | 0.010373444      | 0.15497063       |
| KEGG_PATHOGENIC_ESCHERICHIA_COLI_INFECTION                      | 1.7488441  | 0.011904762      | 0.17216738       |
| KEGG_PURINE_METABOLISM                                          | 1.6673263  | 0.012170386      | 0.14906801       |
| KEGG_GAP_JUNCTION                                               | 1.6483914  | 0.012396694      | 0.14366534       |
| KEGG_BLADDER_CANCER                                             | 1.7637283  | 0.013435701      | 0.19546312       |
| KEGG_SNARE_INTERACTIONS_IN_VESICULAR_TRANSPORT                  | 1.7114455  | 0.016064256      | 0.16438843       |
| KEGG_REGULATION_OF_ACTIN_CYTOSKELETON                           | 1.7046009  | 0.016460905      | 0.15059586       |
| KEGG_VIBRIO_CHOLERAЕ_INFECTION                                  | 1.7124143  | 0.018292682      | 0.17648296       |
| KEGG_SMALL_CELL_LUNG_CANCER                                     | 1.6785665  | 0.018329939      | 0.15270367       |
| KEGG_MELANOGENESIS                                              | 1.6630584  | 0.018595042      | 0.13967341       |
| KEGG_AXON_GUIDANCE                                              | 1.6471983  | 0.02             | 0.12902525       |
| KEGG_GLYCOSAMINOGLYCAN_BIOSYNTHESIS_CHONDROITIN_SULFATE         | 1.6451277  | 0.024844721      | 0.12586027       |
| KEGG_BASAL_CELL_CARCINOMA                                       | 1.5684719  | 0.027027028      | 0.13928673       |
| KEGG_EPITHELIAL_CELL_SIGNALING_IN_HELICOBACTER_PYLORI_INFECTION | 1.6477886  | 0.027667984      | 0.13871863       |
| KEGG_P53_SIGNALING_PATHWAY                                      | 1.5558062  | 0.028089888      | 0.1365577        |
| KEGG_CHRONIC_MYELOID_LEUKEMIA                                   | 1.6473626  | 0.028806584      | 0.1338181        |
| KEGG_CELL_CYCLE                                                 | 1.7635086  | 0.030364372      | 0.1712885        |
| KEGG_T_CELL_RECEPTOR_SIGNALING_PATHWAY                          | 1.7456275  | 0.030549899      | 0.1598494        |
| KEGG_WNT_SIGNALING_PATHWAY                                      | 1.5573068  | 0.030737706      | 0.13850737       |
| KEGG_PHOSPHATIDYLINOSITOL_SIGNALING_SYSTEM                      | 1.6307317  | 0.032193158      | 0.12288766       |
| KEGG_TYPE_II_DIABETES_MELLITUS                                  | 1.5539867  | 0.032319393      | 0.13243896       |
| KEGG_LONG_TERM_DEPRESSION                                       | 1.5745752  | 0.032388665      | 0.14137192       |
| KEGG_MELANOMA                                                   | 1.5366602  | 0.032520324      | 0.13525765       |
| KEGG_LEISHMANIA_INFECTION                                       | 1.709076   | 0.03305785       | 0.15535463       |
| KEGG_GLYCEROPHOSPHOLIPID_METABOLISM                             | 1.4821936  | 0.033464566      | 0.14194037       |
| KEGG_DILATED_CARDIOMYOPATHY                                     | 1.6396748  | 0.036072146      | 0.12726225       |
| KEGG_CYTOSOLIC_DNA_SENSING_PATHWAY                              | 1.6315686  | 0.0375           | 0.12604359       |
| KEGG_B_CELL_RECEPTOR_SIGNALING_PATHWAY                          | 1.697551   | 0.037549406      | 0.14886461       |
| KEGG_CHEMOKINE_SIGNALING_PATHWAY                                | 1.663699   | 0.03757829       | 0.14522162       |
| KEGG_ETHER_LIPID_METABOLISM                                     | 1.5466341  | 0.03960396       | 0.13287674       |
| KEGG_ECM_RECEPTOR_INTERACTION                                   | 1.6233107  | 0.04208417       | 0.12099782       |
| KEGG_SPHINGOLIPID_METABOLISM                                    | 1.5098191  | 0.042682927      | 0.14172791       |
| KEGG_FC_EPSILON_RI_SIGNALING_PATHWAY                            | 1.6230218  | 0.043737575      | 0.117826074      |
| KEGG_HEDGEHOG_SIGNALING_PATHWAY                                 | 1.5247976  | 0.046184737      | 0.13716604       |
| KEGG_VEGF_SIGNALING_PATHWAY                                     | 1.5736735  | 0.046875         | 0.1385639        |
| KEGG_CYTOKINE_CYTOKINE_RECEPTOR_INTERACTION                     | 1.6529329  | 0.047131147      | 0.14498721       |
| KEGG_HOMOLOGOUS_RECOMBINATION                                   | 1.567613   | 0.048117153      | 0.13666774       |
| KEGG_TOLL_LIKE_RECEPTOR_SIGNALING_PATHWAY                       | 1.6257775  | 0.048484847      | 0.122614816      |
| KEGG_PRIMARY_IMMUNODEFICIENCY                                   | 1.634781   | 0.048484847      | 0.12693438       |

**Supplementary Table 5. GSEA analysis in HCC patients with low CMScore.**

| <b>NAME</b>                                       | <b>NES</b> | <b>NOM p-val</b> | <b>FDR q-val</b> |
|---------------------------------------------------|------------|------------------|------------------|
| KEGG_RETINOL_METABOLISM                           | -2.167813  | 0                | 0.002035083      |
| KEGG_PEROXISOME                                   | -2.0712562 | 0                | 0.002079365      |
| KEGG_GLYCINE_SERINE_AND_THREONINE_METABOLISM      | -2.1039007 | 0                | 0.002399225      |
| KEGG_DRUG_METABOLISM_CYTOCHROME_P450              | -2.0773907 | 0                | 0.002495238      |
| KEGG_BETA_ALANINE_METABOLISM                      | -2.1281288 | 0                | 0.002568046      |
| KEGG_TRYPTOPHAN_METABOLISM                        | -2.0808556 | 0                | 0.002895563      |
| KEGG_FATTY_ACID_METABOLISM                        | -2.0415673 | 0                | 0.003641113      |
| KEGG_ARGININE_AND_PROLINE_METABOLISM              | -1.9889241 | 0                | 0.006149278      |
| KEGG_BUTANOATE_METABOLISM                         | -1.9770343 | 0                | 0.006535998      |
| KEGG_PROPANOATE_METABOLISM                        | -1.9579531 | 0                | 0.006807423      |
| KEGG_PPAR_SIGNALING_PATHWAY                       | -1.9671538 | 0                | 0.006864346      |
| KEGG_DRUG_METABOLISM_OTHER_ENZYMES                | -1.9174808 | 0                | 0.009751262      |
| KEGG_VALINE_LEUCINE_AND_ISOLEUCINE_DEGRADATION    | -1.9209632 | 0                | 0.010396404      |
| KEGG_LINOLEIC_ACID_METABOLISM                     | -1.8366377 | 0                | 0.016201999      |
| KEGG_PRIMARY_BILE_ACID_BIOSYNTHESIS               | -1.8980548 | 0.002070393      | 0.009768278      |
| KEGG_HISTIDINE_METABOLISM                         | -1.9145805 | 0.002109705      | 0.009277614      |
| KEGG_STEROID_HORMONE_BIOSYNTHESIS                 | -1.911821  | 0.002136752      | 0.008890382      |
| KEGG_TYROSINE_METABOLISM                          | -1.8882285 | 0.004175365      | 0.009211825      |
| KEGG_METABOLISM_OF_XENOBIOTICS_BY_CYTOCHROME_P450 | -1.893714  | 0.004273505      | 0.009375573      |
| KEGG_LYSINE_DEGRADATION                           | -1.818755  | 0.006122449      | 0.018197488      |
| KEGG_ASCORBATE_AND_ALDARATE_METABOLISM            | -1.8160095 | 0.010351967      | 0.018044308      |
| KEGG_CITRATE_CYCLE_TCA_CYCLE                      | -1.829712  | 0.012145749      | 0.017026087      |
| KEGG_ALANINE_ASPARTATE_AND_GLUTAMATE_METABOLISM   | -1.748662  | 0.012711864      | 0.03250989       |
| KEGG_PYRUVATE_METABOLISM                          | -1.7198697 | 0.014799154      | 0.038862422      |
| KEGG_PARKINSONS_DISEASE                           | -1.868609  | 0.029106028      | 0.011506476      |
| KEGG_NITROGEN_METABOLISM                          | -1.5743402 | 0.03411514       | 0.08322459       |
| KEGG_CYSTEINE_AND_METHIONINE_METABOLISM           | -1.5310292 | 0.036734693      | 0.098343         |
| KEGG_COMPLEMENT_AND_COAGULATION_CASCADES          | -1.7384919 | 0.03877551       | 0.034447856      |
| KEGG_STARCH_AND_SUCROSE_METABOLISM                | -1.5690577 | 0.039337475      | 0.08343582       |
| KEGG_GLYOXYLATE_AND_DICARBOXYLATE_METABOLISM      | -1.6042256 | 0.039915968      | 0.08150707       |
| KEGG_PENTOSE_AND_GLUCURONATE_INTERCONVERSIONS     | -1.6057246 | 0.041841004      | 0.083651654      |
| KEGG_PORPHYRIN_AND_CHLOROPHYLL_METABOLISM         | -1.5906465 | 0.045161292      | 0.08498338       |
| KEGG_BIOSYNTHESIS_OF_UNSATURATED_FATTY_ACIDS      | -1.5831201 | 0.045738045      | 0.08373493       |
| KEGG_ADIPOCYTOKINE_SIGNALING_PATHWAY              | -1.5256513 | 0.046747968      | 0.096184686      |
| KEGG_GLYCOLYSIS_GLUconeogenesis                   | -1.5889574 | 0.04821803       | 0.08305111       |
| KEGG_PHENYLALANINE_METABOLISM                     | -1.5288436 | 0.0491453        | 0.096786246      |
