# Supplementary material for: Copper metabolism-related risk score identifies hepatocellular carcinoma subtypes and SLC27A5 as a potential regulator of cuproptosis
Source: Aging (Albany NY). 2023 Dec 28;15(24):15084–113. doi: 10.18632/aging.205334 (PMC10781498; doi:10.18632/aging.205334)
Supplement: Supplementary Table 1 [file aging-15-205334-s002.pdf]

## SUPPLEMENTARY TABLES

**Supplementary Table 1. Clinicopathological information of HCC patients whose samples were used in the tissue chip.**

| Demographic data |        |    |    |    | Clinical data |               |               |                 |            |
|------------------|--------|----|----|----|---------------|---------------|---------------|-----------------|------------|
| Age              | Gender | T  | N  | M  | Stage         | HBV infection | HCV infection | liver cirrhosis | Child-pugh |
| 32               | Female | T4 | N0 | M0 | IIIB          | HBV infection | HCV infection | Yes             | A          |
| 32               | Male   | T2 | N0 | M0 | II            | Yes           | No            | Yes             | A          |
| 38               | Male   | T2 | N0 | M0 | II            | Yes           | No            | Yes             | A          |
| 43               | Female | T2 | N0 | M0 | II            | Yes           | No            | No              | A          |
| 45               | Male   | T2 | N0 | M0 | II            | Yes           | No            | Yes             | A          |
| 46               | Female | T2 | N0 | M0 | II            | Yes           | No            | Yes             | A          |
| 47               | Male   | T2 | N0 | M0 | II            | Yes           | No            | Yes             | A          |
| 47               | Female | T1 | N0 | M0 | I             | Yes           | No            | No              | A          |
| 48               | Male   | T2 | N0 | M0 | II            | Yes           | No            | Yes             | A          |
| 49               | Male   | T2 | N0 | M0 | II            | Yes           | No            | Yes             | A          |
| 49               | Male   | T3 | N0 | M0 | IIIA          | Yes           | No            | Yes             | A          |
| 50               | Male   | T4 | N0 | M0 | IIIB          | Yes           | No            | Yes             | A          |
| 52               | Male   | T3 | N0 | M0 | IIIA          | No            | Yes           | Yes             | B          |
| 53               | Female | T2 | N0 | M0 | II            | Yes           | No            | No              | A          |
| 53               | Female | T2 | N0 | M0 | II            | Yes           | No            | Yes             | A          |
| 54               | Male   | T1 | N0 | M0 | I             | Yes           | No            | No              | A          |
| 54               | Male   | T1 | N0 | M0 | I             | Yes           | No            | No              | A          |
| 54               | Female | T1 | N0 | M0 | I             | Yes           | No            | Yes             | A          |
| 54               | Male   | T3 | N0 | M0 | IIIA          | Yes           | No            | Yes             | A          |
| 54               | Male   | T3 | N0 | M0 | IIIA          | No            | No            | No              | A          |
| 55               | Female | T3 | N0 | M0 | IIIA          | Yes           | No            | No              | A          |
| 55               | Male   | T4 | N0 | M0 | IIIB          | Yes           | No            | Yes             | A          |
| 57               | Female | T1 | N0 | M0 | I             | No            | No            | Yes             | A          |
| 57               | Female | T3 | N0 | M0 | IIIA          | Yes           | No            | Yes             | A          |
| 59               | Female | T2 | N0 | M0 | II            | Yes           | No            | Yes             | A          |
| 59               | Female | T2 | N0 | M0 | II            | Yes           | No            | Yes             | A          |
| 59               | Female | T2 | N0 | M0 | II            | Yes           | No            | Yes             | A          |
| 59               | Female | T3 | N0 | M0 | IIIA          | No            | Yes           | No              | A          |
| 59               | Male   | T4 | N0 | M0 | IIIB          | Yes           | No            | Yes             | A          |
| 61               | Male   | T2 | N0 | M0 | II            | Yes           | No            | No              | A          |
| 62               | Female | T4 | N0 | M0 | IIIB          | Yes           | No            | No              | B          |
| 62               | Male   | T2 | N0 | M0 | II            | No            | No            | Yes             | A          |
| 62               | Male   | T4 | N0 | M0 | IIIB          | No            | No            | Yes             | A          |
| 63               | Female | T2 | N0 | M0 | II            | No            | No            | No              | A          |
| 63               | Female | T2 | N0 | M0 | II            | No            | No            | No              | A          |
| 64               | Male   | T1 | N0 | M0 | I             | No            | No            | Yes             | A          |
| 65               | Female | T2 | N0 | M0 | II            | Yes           | No            | Yes             | B          |
| 66               | Male   | T4 | N0 | M0 | IIIB          | No            | No            | No              | A          |
| 66               | Female | T4 | N0 | M0 | IIIB          | No            | No            | No              | A          |
| 68               | Female | T1 | N0 | M0 | I             | No            | No            | Yes             | A          |
| 69               | Male   | T1 | N0 | M0 | I             | No            | No            | Yes             | A          |
| 69               | Female | T1 | N0 | M0 | I             | Yes           | No            | Yes             | A          |
| 69               | Female | T1 | N0 | M0 | I             | No            | Yes           | Yes             | A          |
| 72               | Male   | T4 | N0 | M0 | IIIB          | No            | No            | No              | A          |

|    |        |    |    |    |    |     |    |     |   |
|----|--------|----|----|----|----|-----|----|-----|---|
| 74 | Female | T1 | N0 | M0 | I  | No  | No | Yes | A |
| 77 | Male   | T2 | N0 | M0 | II | Yes | No | Yes | A |

---
