# Supplementary material for: Copper metabolism-related risk score identifies hepatocellular carcinoma subtypes and SLC27A5 as a potential regulator of cuproptosis
Source: Aging (Albany NY). 2023 Dec 28;15(24):15084–113. doi: 10.18632/aging.205334 (PMC10781498; doi:10.18632/aging.205334)
Supplement: Supplementary Table 2 [file aging-15-205334-s003.xlsx]

## Sheet: Supplementary Table 2
Supplementary Table 2. The 14 copper metabolism related pathways downloaded from the GSEA website.
Term
GOBP_CELLULAR_COPPER_ION_HOMEOSTASIS	ABCB6	ANKRD9	SLC31A1	SLC31A2	PRND	CCDC22	APP	ARF1	MT2A	ATOX1	ATP7A	ATP7B	PRNP	SCO1	COX19	SCO2
GOBP_CELLULAR_RESPONSE_TO_COPPER_ION	CYP1A1	DAXX	BACE1	AOC1	MT1DP	HSF1	APP	AQP1	AQP2	MT1A	MT1B	MT1E	MT1F	MT1G	MT1H	MT1M	MT1X	MT2A	MT3	NFE2L2	ATP7A	PRNP	MT1HL1	SNCA	MAP1LC3A	MT4	BECN1
GOBP_COPPER_ION_HOMEOSTASIS	ABCB6	ANKRD9	SLC31A1	SLC31A2	COMMD1	PRND	CCDC22	XIAP	APP	ARF1	MT2A	ATOX1	CUTC	ATP7A	ATP7B	PRNP	SCO1	COX19	SCO2
GOBP_COPPER_ION_IMPORT	SLC31A1	STEAP2	ATP7A	ATP7B	STEAP3	STEAP4
GOBP_COPPER_ION_TRANSMEMBRANE_TRANSPORT	SLC31A1	SLC31A2	STEAP2	SLC11A2	ATP7A	ATP7B
GOBP_COPPER_ION_TRANSPORT	COX17	SLC31A1	SLC31A2	CP	FKBP4	STEAP2	HEPHL1	ATOX1	SLC11A2	CUTC	ATP7A	ATP7B	STEAP3	STEAP4	MMGT1	HEPH
GOBP_DETOXIFICATION_OF_COPPER_ION	PARK7	MT1DP	MT1A	MT1B	MT1E	MT1F	MT1G	MT1H	MT1M	MT1X	MT2A	MT3	ATP7A	MT1HL1	MT4
GOBP_RESPONSE_TO_COPPER_ION	PARK7	AANAT	CYP1A1	DAXX	BACE1	AOC1	MT1DP	HSF1	APP	IL1A	AQP1	AQP2	LCAT	LOXL2	MT1A	MT1B	MT1E	MT1F	MT1G	MT1H	MT1M	MT1X	MT2A	MT3	MT	CO1	NFE2L2	PAM	ATP5F1D	ATP7A	ATP7B	PRNP	MT1HL1	SNCA	SOD1	SOD3	SORD	TFRC	MAP1LC3A	MT4	BECN1	CDK1
GOMF_COPPER_CHAPERONE_ACTIVITY	COX17	PARK7	ATOX1	ATP7A	SCO1	SCO2
GOMF_COPPER_ION_BINDING	MOXD2P	COX17	MTCO2P12	PARK7	COX11	CP	LACC1	COMMD1	DBH	DCT	ALB	F5	F8	OR5AR1	ADNP	ATP13A2	PRND	AOC1	MOXD1	GPC1	ANG	SUMF1	AOC2	SNAI3	APOA4	HEPHL1	IL1A	COA6	LOX	LOXL1	LOXL2	MT3	MT	CO2	ATOX1	ACR	P2RX4	PAM	CUTC	CUTA	ATP7A	ATP7B	PRNP	HAMP	S100A5	S100A12	S100A13	SCO1	SNCB
GOMF_COPPER_ION_TRANSMEMBRANE_TRANSPORTER_ACTIVITY	SLC31A1	SLC31A2	SLC11A2	ATP7A	ATP7B
HP_ABNORMAL_CIRCULATING_COPPER_CONCENTRATION	AP1S1	CP	AP1B1	TMPRSS6	SPATA5	COG2	ATP6V0A2	ATP6AP1	ATP7B	SCO2
HP_DECREASED_CIRCULATING_COPPER_CONCENTRATION	AP1S1	CP	AP1B1	TMPRSS6	COG2	ATP6AP1
WP_COPPER_HOMEOSTASIS	COX17	ADAM10	SLC31A1	SLC31A2	COX11	COMMD1	AKT1	MTF2	FOXO1	FOXO3	BACE1	STEAP2	STEAP1	GSK3B	APC	XIAP	APP	JUN	MAPT	MDM2	MT1A	MT1B	MT1E	MT1F	MT1G	MT1H	MT1JP	MT1L	MT1X	MT2A	MT3	MTF1	ATOX1	SLC11A2	PIK3CA	ATP7A	ATP7B	XAF1	STEAP3	PRNP	PTEN	CCND1	SCO1	SOD1	SOD3	SP1	ADAM17	TP53	STEAP4
[truncated: 13 more columns]
