# Supplementary material for: Copper metabolism-related risk score identifies hepatocellular carcinoma subtypes and SLC27A5 as a potential regulator of cuproptosis
Source: Aging (Albany NY). 2023 Dec 28;15(24):15084–113. doi: 10.18632/aging.205334 (PMC10781498; doi:10.18632/aging.205334)
Supplement: Supplementary Table 3 [file aging-15-205334-s004.xlsx]

## Sheet: Supplementary Table 3
Supplementary Table 3. The 134 copper metabolism related genes used in this study.
Symbol
AANAT
ABCB6
ACR
ADAM10
ADAM17
ADAM9
ADNP
AKT1
ALB
ANG
ANKRD9
AOC1
AOC2
AOC3
AP1B1
AP1S1
APC
APOA4
APP
AQP1
AQP2
ARF1
ATOX1
ATP13A2
ATP5F1D
ATP6AP1
ATP6V0A2
ATP7A
ATP7B
BACE1
BECN1
CASP3
CCDC22
CCND1
CCS
CDK1
CO1
CO2
COA6
COG2
COMMD1
COX11
COX17
COX19
CP
CUTA
CUTC
CYP1A1
DAXX
DBH
DCT
F5
F8
FKBP4
FOXO1
FOXO3
GPC1
GSK3B
HAMP
HEPH
HEPHL1
HSF1
IL1A
JUN
LACC1
LCAT
LOX
LOXL1
LOXL2
LOXL3
LOXL4
MAP1LC3A
MAPT
MDM2
MMGT1
MOXD1
MOXD2P
MT
MT1A
MT1B
MT1DP
MT1E
MT1F
MT1G
MT1H
MT1HL1
MT1JP
MT1L
MT1M
MT1X
MT2A
MT3
MT4
MTCO2P12
MTF1
MTF2
NFE2L2
OR5AR1
P2RX4
PAM
PARK7
PIK3CA
PRND
PRNP
PTEN
RNF7
S100A12
S100A13
S100A5
SCO1
SCO2
SLC11A2
SLC31A1
SLC31A2
SNAI3
SNCA
SNCB
SNCG
SOD1
SOD3
SORD
SP1
SPATA5
STEAP1
STEAP2
STEAP3
STEAP4
SUMF1
TFRC
TMPRSS6
TP53
TYR
XAF1
XIAP
