# Supplementary material for: Copper metabolism-related risk score identifies hepatocellular carcinoma subtypes and SLC27A5 as a potential regulator of cuproptosis
Source: Aging (Albany NY). 2023 Dec 28;15(24):15084–113. doi: 10.18632/aging.205334 (PMC10781498; doi:10.18632/aging.205334)
Supplement: Supplementary Table 6 [file aging-15-205334-s006.xlsx]

## Sheet: Supplementary Table 6
Supplementary Table 6. The comparison between CMscore and previously published signatures in predicting prognosis of HCC patients.
Signature	PMID	Calculation	TCGA-LIHC			GSE14520
			C-index	se	p-value	C-index	se	p-value
CMscore			0.640647	0.0280032		0.663804	0.0297505
Signature 1	31492561	riskscore=0.16*PLEKHB1-0.08*ESR1-0.13*SLCO2A1-0.21*GNA14	0.639072	0.0266328	0.957346	0.63268	0.0322788	0.256731
Signature 2	32514252	riskscore=-0.0627*ANXA10-0.03552*CYP2C9-0.02365*LCAT-0.02237*LECT2-0.01796*RDH16+0.0015*LAPTM4B+0.0386*KIF20A+0.05124*SPP1+0.05284*MAGEA6+0.05377*TPX2+0.0565*HMMR+0.09788*TTK	0.707784	0.0240966	0.00152162	0.611246	0.0324042	0.0551223
Signature 3	32760210	riskscore=0.105*SLC7A11+0.116*G6PD+0.106*CISD1+0.076*CARS+0.077*SLC1A5+0.092*ACACA+0.005*ACSL3+0.006*NQO1+0.087*NFS1+0.135*GPX4	0.689272	0.0239664	0.0929656	0.597666	0.0318599	0.043724
Signature 4	32760725	riskscore=0.921*YBX1+0.149*TTC26+0.732*SLC41A3-0.631*RCBTB2-0.227*PON1+0.539*MAPK7+1.28*INPP5B+0.645*CCDC134-0.478*C16orf71+0.861*BMI1	0.724363	0.0236875	0.00118589	0.590399	0.030794	0.0379905
Signature 5	33014055	riskscore=0.03402*ETF1+0.00670*GSR+0.02556*SKAP2+0.00181*HSPD1+0.02034*CACYBP+0.00916*PNP	0.656259	0.0267945	0.638078	0.509066	0.0333074	0.000113813
Signature 6	33163533	riskscore=0.256*FKBP11+0.459*SCRIB+0.446*SLC38A2-0.343*SORBS2-0.736*STAB2	0.571613	0.0265369	0.038667	0.654922	0.0284194	0.785332
